# Supplementary material for: Proteomic approach underlying the hippocampal neurodegeneration caused by low doses of methylmercury after long-term exposure in adult rats
Source: Royal Society of Chemistry journal article supplement (doi:10.1039/c8mt00297e), 2018-11-26
Supplement: c8mt00297e1.pdf [file c8mt00297e1.pdf]

Supplementary Table 1. Unique proteins with expression significantly altered in the hippocampus of rats of group of exposed to MeHg group (EG) vs. control group (CG).

| <sup>a</sup> Access Number | Protein name description                                              | PLGS Score | Group |      |
|----------------------------|-----------------------------------------------------------------------|------------|-------|------|
|                            |                                                                       |            | C     | MeHg |
| <b>Q6AXQ5</b>              | 2',5'-phosphodiesterase 12                                            | 156.52     | +     | -    |
| <b>Q63570</b>              | 26S proteasome regulatory subunit 6B                                  | 154.03     | +     | -    |
| <b>P0C2C0</b>              | 39S ribosomal protein L22, mitochondrial                              | 145.93     | +     | -    |
| <b>P62083</b>              | 40S ribosomal protein S7                                              | 406.14     | -     | +    |
| <b>D3ZWR1</b>              | 5', 3'-nucleotidase, cytosolic                                        | 156.77     | +     | -    |
| <b>P02401</b>              | 60S acidic ribosomal protein P2                                       | 103.06     | +     | -    |
| <b>A7UAK3</b>              | 6-phosphofructo-2-kinase/fructose-2, 6-biphosphatase 3 splice variant | 134.47     | +     | -    |
| <b>O35552</b>              | 6-phosphofructo-2-kinase/fructose-2,6-bisphosphatase 3                | 134.47     | +     | -    |
| <b>G3V8D5</b>              | 6-phosphogluconolactonase                                             | 181.41     | -     | +    |
| <b>A0A0G2K6E7</b>          | AarF domain-containing kinase 5                                       | 123.95     | +     | -    |
| <b>Q7TP34</b>              | Ab2-450                                                               | 98.65      | +     | -    |
| <b>A2VD09</b>              | Abi1 protein                                                          | 143.58     | -     | +    |
| <b>Q7TPI4</b>              | Ac2-300                                                               | 102.99     | +     | -    |
| <b>B3DMA6</b>              | Actin-like protein 9                                                  | 353.7      | -     | +    |
| <b>Q99PD4</b>              | Actin-related protein 2/3 complex subunit 1A                          | 4063.54    | +     | -    |
| <b>O88656</b>              | Actin-related protein 2/3 complex subunit 1B                          | 154.25     | +     | -    |
| <b>B2GV73</b>              | Actin-related protein 2/3 complex subunit 3                           | 440.4      | +     | -    |
| <b>B2RZ72</b>              | Actin-related protein 2/3 complex subunit 4                           | 374.5      | -     | +    |
| <b>Q5XIK1</b>              | Actin-related protein T1                                              | 215.2      | +     | -    |
| <b>A0A0G2K2H6</b>          | Acyl-coenzyme A amino acid N-acyltransferase 1                        | 135.57     | -     | +    |
| <b>Q6SKG1</b>              | Acyl-coenzyme A synthetase ACSM3, mitochondrial                       | 120.42     | +     | -    |
| <b>Q63768</b>              | Adapter molecule crk                                                  | 192.48     | -     | +    |
| <b>P69682</b>              | Adaptin ear-binding coat-associated protein 1                         | 310.86     | -     | +    |

|                   |                                                                                        |        |   |   |
|-------------------|----------------------------------------------------------------------------------------|--------|---|---|
| <b>D3ZUY8</b>     | Adaptor protein complex AP-2, alpha 1 subunit (Predicted)                              | 153.14 | + | - |
| <b>G3V8Q9</b>     | Adenomatous polyposis coli, isoform CRA_a                                              | 109.08 | + | - |
| <b>P70478</b>     | Adenomatous polyposis coli protein                                                     | 109.08 | + | - |
| <b>G3V8T3</b>     | Adenosine deaminase, RNA-specific, isoform CRA_b                                       | 69.47  | - | + |
| <b>A0A0G2JUP2</b> | Adhesion G protein-coupled receptor V1                                                 | 152.69 | + | - |
| <b>Q7TP48</b>     | Adipocyte plasma membrane-associated protein                                           | 102.08 | - | + |
| <b>Q05962</b>     | ADP/ATP translocase 1                                                                  | 627.22 | + | - |
| <b>Q09073</b>     | ADP/ATP translocase 2                                                                  | 723.55 | + | - |
| <b>Q62924</b>     | A-kinase anchor protein 11                                                             | 45.16  | + | - |
| <b>A0A0G2K548</b> | A-kinase-anchoring protein 9                                                           | 111.47 | + | - |
| <b>ADH1_YEAST</b> | Alcohol dehydrogenase 1                                                                | 734.08 | + | - |
| <b>P12711</b>     | Alcohol dehydrogenase class-3                                                          | 174.15 | + | - |
| <b>Q6AYQ2</b>     | Aldo-keto reductase family 1 member C21                                                | 200.23 | + | - |
| <b>F1LQ80</b>     | Aldo-keto reductase family 1, member C2                                                | 200.23 | + | - |
| <b>Q5F2L1</b>     | Alpha-(1,3)-fucosyltransferase 10                                                      | 70.44  | + | - |
| <b>Q09325</b>     | Alpha-1,3-mannosyl-glycoprotein 2-beta-N-acetylglucosaminyltransferase                 | 72.75  | - | + |
| <b>A0A0G2K8F6</b> | Alpha-mannosidase                                                                      | 142.88 | + | - |
| <b>G3V6R0</b>     | Amino acid transporter                                                                 | 143.74 | + | - |
| <b>Q6AYS7</b>     | Aminoacylase-1A                                                                        | 122.1  | - | + |
| <b>F1M9V7</b>     | Aminopeptidase                                                                         | 115.66 | - | + |
| <b>F1M8D5</b>     | Amyotrophic lateral sclerosis 2 (Juvenile) chromosome region, candidate 13 (Predicted) | 89.27  | - | + |
| <b>D3ZDK4</b>     | Angiopoietin-related protein 7-like                                                    | 128.88 | + | - |
| <b>B2RYI5</b>     | Ankrd40 protein                                                                        | 84.78  | - | + |
| <b>B1WC29</b>     | Ankrd49 protein                                                                        | 206.35 | - | + |
| <b>M0RC04</b>     | Ankyrin repeat and MYND domain-containing 1                                            | 62.11  | + | - |
| <b>Q32Q00</b>     | Ankyrin repeat and SOCS box-containing 12                                              | 129.63 | - | + |
| <b>D4A6I3</b>     | Ankyrin repeat domain 13B                                                              | 193.3  | + | - |

|                   |                                                      |        |   |   |
|-------------------|------------------------------------------------------|--------|---|---|
| <b>Q66HH8</b>     | Annexin                                              | 110.91 | - | + |
| <b>P14668</b>     | Annexin A5                                           | 110.91 | - | + |
| <b>O88321</b>     | Antisecretory factor                                 | 103.3  | - | + |
| <b>P62944</b>     | AP-2 complex subunit beta                            | 100.21 | + | - |
| <b>Q8K4H4</b>     | Aprataxin                                            | 118.74 | + | - |
| <b>D3ZF86</b>     | ARFGEF family member 3                               | 44.18  | + | - |
| <b>P09034</b>     | Argininosuccinate synthase                           | 130.48 | - | + |
| <b>B0BN83</b>     | Armadillo repeat-containing protein 1                | 150.11 | + | - |
| <b>D3ZAQ1</b>     | ARP5 actin-related protein 5 homolog                 | 73.83  | - | + |
| <b>F1M9V0</b>     | Ataxin 7-like 1                                      | 163.78 | + | - |
| <b>P19511</b>     | ATP synthase F(0) complex subunit B1, mitochondrial  | 434.16 | + | - |
| <b>P30835</b>     | ATP-dependent 6-phosphofructokinase, liver type      | 134.76 | + | - |
| <b>F1LNP1</b>     | AT-rich interaction domain 1B                        | 54.88  | - | + |
| <b>F1LNQ2</b>     | Autophagy and beclin 1 regulator 1                   | 309.3  | + | - |
| <b>D3ZFK6</b>     | Autophagy-related 16-like 1                          | 50.01  | - | + |
| <b>D3ZMI4</b>     | Band 4.1-like protein 1                              | 103.24 | + | - |
| <b>D3ZU26</b>     | Basic helix-loop-helix family, member e23            | 130.18 | + | - |
| <b>M0RCL1</b>     | BEN domain-containing 3                              | 96.21  | + | - |
| <b>Q66HG3</b>     | Beta-Ala-His dipeptidase                             | 60.4   | + | - |
| <b>P02524</b>     | Beta-crystallin B3                                   | 142.22 | + | - |
| <b>Q4FZV0</b>     | Beta-mannosidase                                     | 105.78 | - | + |
| <b>G3V7X7</b>     | BRCA1-associated RING domain protein 1               | 109.12 | - | + |
| <b>A0A0G2JYH8</b> | Brevican core protein                                | 195.93 | - | + |
| <b>F1M8A0</b>     | Butyrophilin-like 5                                  | 81.85  | + | - |
| <b>Q8R490</b>     | Cadherin 13                                          | 67.08  | - | + |
| <b>Q767I2</b>     | Cadherin-related neuronal receptor 10                | 51.97  | + | - |
| <b>P07171</b>     | Calbindin                                            | 155.83 | - | + |
| <b>D3ZW89</b>     | Calcium binding protein 5 (Predicted), isoform CRA_b | 171.9  | + | - |

|                   |                                                               |        |   |   |
|-------------------|---------------------------------------------------------------|--------|---|---|
| <b>O70150</b>     | Calcium/calmodulin-dependent protein kinase type 1B           | 145.75 | - | + |
| <b>F1LNC7</b>     | Calcium-activated potassium channel subunit alpha-1           | 142.13 | + | - |
| <b>Q66HR5</b>     | Calcium-binding and coiled-coil domain-containing protein 1   | 626.87 | + | - |
| <b>M0R793</b>     | Calcium-binding protein 2                                     | 492.41 | + | - |
| <b>Q5BK10</b>     | Calpain-13                                                    | 97.58  | + | - |
| <b>P27321</b>     | Calpastatin                                                   | 91.55  | - | + |
| <b>P47728</b>     | Calretinin                                                    | 102.82 | + | - |
| <b>D3ZZR7</b>     | Cancer/testis antigen 2                                       | 172.83 | + | - |
| <b>M0R6B1</b>     | Caprin family member 2                                        | 71.44  | + | - |
| <b>B5DFG6</b>     | Car13 protein                                                 | 74.58  | + | - |
| <b>P10959</b>     | Carboxylesterase 1C                                           | 126.65 | + | - |
| <b>Q6IRK9</b>     | Carboxypeptidase Q                                            | 134.16 | + | - |
| <b>A0A0H2UHQ2</b> | Casein kinase 1, gamma 2, isoform CRA_b                       | 68.91  | - | + |
| <b>Q62762</b>     | Casein kinase I isoform gamma-2                               | 73.7   | - | + |
| <b>Q9JHK1</b>     | Caspase 9, isoform CRA_a                                      | 156.18 | + | - |
| <b>A0A0G2JT93</b> | Catenin (Cadherin associated protein), beta 1, isoform        | 105.39 | + | - |
| <b>Q9WU82</b>     | Catenin beta-1                                                | 105.39 | + | - |
| <b>P00787</b>     | Cathepsin B                                                   | 71.49  | - | + |
| <b>P24268</b>     | Cathepsin D                                                   | 110.66 | - | + |
| <b>A0A0G2K5S0</b> | Cation channel sperm-associated auxiliary subunit gamma       | 46.29  | - | + |
| <b>Q5PQL2</b>     | CCR4-NOT transcription complex subunit 9                      | 94.68  | + | - |
| <b>Q4V884</b>     | CDC16 cell division cycle 16 homolog ( <i>S. cerevisiae</i> ) | 73.15  | - | + |
| <b>M0R837</b>     | CDK5 regulatory subunit-associated protein 1-like 1           | 93.55  | - | + |
| <b>A0A0G2JT88</b> | Cell division cycle 16                                        | 71.94  | - | + |
| <b>Q62623</b>     | Cell division cycle protein 20 homolog                        | 127.96 | + | - |
| <b>D3ZZ61</b>     | Centrosomal protein 68                                        | 94.8   | + | - |
| <b>F7EXF4</b>     | Centrosomal protein 85-like                                   | 85.87  | - | + |
| <b>A0A0G2KBC1</b> | Centrosomal protein POC5                                      | 37.47  | + | - |

|                   |                                                        |        |   |   |
|-------------------|--------------------------------------------------------|--------|---|---|
| <b>O54735</b>     | cGMP-specific 3',5'-cyclic phosphodiesterase           | 88.43  | - | + |
| <b>E9PT11</b>     | Chromobox 6                                            | 264.58 | + | - |
| <b>Q4V8E4</b>     | Cilia- and flagella-associated protein 36              | 97.1   | - | + |
| <b>D4AD05</b>     | Ciliary rootlet coiled-coil, rootletin                 | 56.01  | + | - |
| <b>A0A0G2K0B6</b> | Clathrin coat assembly protein AP180                   | 170.84 | + | - |
| <b>A0A0G2JZ07</b> | Clusterin                                              | 120.52 | + | - |
| <b>Q3ZRW7</b>     | Clusterin-like protein 1                               | 142.22 | + | - |
| <b>B2GV96</b>     | Coiled-coil domain-containing 115                      | 216.01 | + | - |
| <b>Q6PEB9</b>     | Coiled-coil domain-containing protein 127              | 118.71 | + | - |
| <b>D3ZTE2</b>     | Coiled-coil domain-containing protein 132-like         | 116.94 | - | + |
| <b>Q3ZAV0</b>     | Coiled-coil domain-containing protein 60               | 130.51 | - | + |
| <b>F1M6Q3</b>     | Collagen type IV alpha 2 chain                         | 99.47  | + | - |
| <b>D3ZZT9</b>     | Collagen type XIV alpha 1 chain                        | 42.52  | + | - |
| <b>P23097</b>     | Collagenase 3                                          | 63.41  | - | + |
| <b>A0A0G2KBC4</b> | Colony stimulating factor 1 receptor                   | 39.75  | + | - |
| <b>G3V6K0</b>     | COMM domain containing 5, isoform CRA_a                | 108.41 | - | + |
| <b>Q9ERR2</b>     | COMM domain-containing protein 5                       | 108.41 | - | + |
| <b>A0A1B0GWS5</b> | Complement C5                                          | 52.97  | - | + |
| <b>F1LND1</b>     | Component of oligomeric golgi complex 1                | 47.82  | + | - |
| <b>Q63198</b>     | Contactin-1                                            | 158.73 | + | - |
| <b>Q62682</b>     | Contactin-3                                            | 70.77  | - | + |
| <b>Q0V8T3</b>     | Contactin-associated protein like 5-4                  | 120.07 | - | + |
| <b>F1LMS4</b>     | Contactin-associated protein-like 5-3                  | 120.07 | - | + |
| <b>P61203</b>     | COP9 signalosome complex subunit 2                     | 97.65  | + | - |
| <b>O35828</b>     | Coronin-7                                              | 102.37 | + | - |
| <b>D3ZGE6</b>     | Cortactin, isoform CRA_c                               | 253.81 | - | + |
| <b>Q9EQH5</b>     | C-terminal-binding protein 2                           | 182.75 | - | + |
| <b>G3V897</b>     | CTR9 homolog, Paf1/RNA polymerase II complex component | 73.04  | - | + |

|                   |                                                                                                                          |        |   |   |
|-------------------|--------------------------------------------------------------------------------------------------------------------------|--------|---|---|
| <b>D4A0E3</b>     | C-type (Calcium dependent, carbohydrate-recognition domain) lectin, superfamily member 1 (Cartilage-derived) (Predicted) | 110.4  | - | + |
| <b>D4AD02</b>     | C-type lectin domain family 9 member A                                                                                   | 191.58 | - | + |
| <b>A0A0G2K685</b> | Cyclic nucleotide-gated channel beta 1                                                                                   | 39.76  | + | - |
| <b>M0R9G9</b>     | Cysteine protease                                                                                                        | 190.89 | - | + |
| <b>P36201</b>     | Cysteine-rich protein 2                                                                                                  | 204.28 | - | + |
| <b>P00406</b>     | Cytochrome c oxidase subunit 2                                                                                           | 147.34 | + | - |
| <b>P10888</b>     | Cytochrome c oxidase subunit 4 isoform 1, mitochondria                                                                   | 158.65 | + | - |
| <b>D3ZFAQ8</b>    | Cytochrome c-1                                                                                                           | 664.73 | + | - |
| <b>P20814</b>     | Cytochrome P450 2C13, male-specific                                                                                      | 91.28  | - | + |
| <b>P10633</b>     | Cytochrome P450 2D1                                                                                                      | 97.9   | - | + |
| <b>G3V8J2</b>     | Cytochrome P450 family 8 subfamily B member 1                                                                            | 131.45 | + | - |
| <b>F1LR47</b>     | Cytochrome P450, family 2, subfamily C, polypeptide 6, variant 1                                                         | 113.73 | + | - |
| <b>F1LRG0</b>     | Cytochrome P450, family 21, subfamily a, polypeptide 1                                                                   | 146.75 | + | - |
| <b>F1M5X7</b>     | Dachsous cadherin-related 2                                                                                              | 73.64  | - | + |
| <b>F1M8Y4</b>     | DEP domain-containing MTOR-interacting protein                                                                           | 97.04  | - | + |
| <b>D3ZSZ6</b>     | Diacylglycerol kinase                                                                                                    | 43.87  | - | + |
| <b>Q63707</b>     | Dihydroorotate dehydrogenase (quinone), mitochondrial                                                                    | 165.14 | + | - |
| <b>Q8K4B7</b>     | Dimethylaniline monooxygenase [N-oxide-forming] 4                                                                        | 101.79 | + | - |
| <b>Q5U2X4</b>     | Dipeptidase 3                                                                                                            | 58.76  | - | + |
| <b>Q5U2P0</b>     | DIS3-like exonuclease 1                                                                                                  | 66.33  | + | - |
| <b>D3ZIL9</b>     | DIS3-like exonuclease 2                                                                                                  | 115.84 | + | - |
| <b>O88797</b>     | Disabled homolog 2                                                                                                       | 83.88  | - | + |
| <b>Q91ZV2</b>     | Discoidin, CUB and LCCL domain-containing protein 2                                                                      | 64.8   | - | + |
| <b>A0A0G2KB74</b> | Disco-interacting protein 2 homolog A                                                                                    | 69.48  | - | + |
| <b>D3ZZB0</b>     | Disco-interacting protein 2 homolog C                                                                                    | 38.18  | - | + |
| <b>Q62936</b>     | Disks large homolog 3                                                                                                    | 189.88 | + | - |
| <b>P31016</b>     | Disks large homolog 4                                                                                                    | 59.2   | + | - |

|                   |                                                                 |        |   |   |
|-------------------|-----------------------------------------------------------------|--------|---|---|
| <b>G3V616</b>     | Divalent cation tolerant protein CUTA, isoform CRA_b            | 416.8  | - | + |
| <b>Q6AXY4</b>     | DNA polymerase delta subunit 2                                  | 71.82  | + | - |
| <b>D3ZYP7</b>     | DNA polymerase gamma 2, accessory subunit                       | 127.54 | + | - |
| <b>D3ZJ19</b>     | DNA-binding protein SATB                                        | 110.88 | + | - |
| <b>Q5YKV6</b>     | DnaJ (Hsp40) related, subfamily B, member 13                    | 107.75 | + | - |
| <b>D3ZTT0</b>     | Double homeobox B-like 1                                        | 147.76 | + | - |
| <b>D3Z9E7</b>     | Double PHD fingers 3                                            | 38.17  | + | - |
| <b>P55266</b>     | Double-stranded RNA-specific adenosine deaminase                | 69.47  | - | + |
| <b>M0RD87</b>     | Dual specificity phosphatase-like 15 (Predicted), isoform CRA_b | 148.58 | - | + |
| <b>B4F7B7</b>     | Dual specificity protein phosphatase 15                         | 369.01 | - | + |
| <b>Q64346</b>     | Dual specificity protein phosphatase 6                          | 144.48 | + | - |
| <b>D4A8U7</b>     | Dynactin 1, isoform CRA_a                                       | 119.37 | + | - |
| <b>P28023</b>     | Dynactin subunit 1                                              | 119.37 | + | - |
| <b>Q6AYH5</b>     | Dynactin subunit 2                                              | 181.4  | - | + |
| <b>Q66HC9</b>     | Dynein intermediate chain 2, axonemal                           | 47.16  | - | + |
| <b>P63170</b>     | Dynein light chain 1, cytoplasmic                               | 349.23 | + | - |
| <b>A0A0G2JU43</b> | Dynein light chain 1-like                                       | 291.02 | + | - |
| <b>Q78P75</b>     | Dynein light chain 2, cytoplasmic                               | 291.02 | + | - |
| <b>P62628</b>     | Dynein light chain roadblock-type 1                             | 896.47 | - | + |
| <b>Q6MFZ5</b>     | E3 ubiquitin-protein ligase TRIM39                              | 203.8  | + | - |
| <b>D3ZD71</b>     | EF-hand domain-containing 1                                     | 54.38  | + | - |
| <b>Q811U3</b>     | ELKS/Rab6-interacting/CAST family member 1                      | 51.15  | - | + |
| <b>Q68FR6</b>     | Elongation factor 1-gamma                                       | 210.79 | + | - |
| <b>P05197</b>     | Elongation factor 2                                             | 185.76 | + | - |
| <b>Q9QYU2</b>     | Elongation factor Ts, mitochondrial                             | 103.34 | + | - |
| <b>P52555</b>     | Endoplasmic reticulum resident protein 29                       | 231.78 | - | + |
| <b>Q3ZAV8</b>     | Enhancer of mRNA-decapping protein 4                            | 55.99  | + | - |
| <b>Q5PPH0</b>     | Enolase-phosphatase E1                                          | 207.25 | - | + |

|               |                                                      |        |   |   |
|---------------|------------------------------------------------------|--------|---|---|
| <b>D3ZDH4</b> | Eph receptor A1                                      | 136.87 | + | - |
| <b>F1LX55</b> | EPH receptor A10                                     | 89.98  | + | - |
| <b>Q4V882</b> | Ephrin type-A receptor 7                             | 142.44 | + | - |
| <b>Q6MG84</b> | Epidermal growth factor-like protein 8               | 114.3  | - | + |
| <b>B2RYD2</b> | Epithelial splicing regulatory protein 1             | 62.8   | - | + |
| <b>F1LTS8</b> | Epoxide hydrolase                                    | 53.35  | - | + |
| <b>D4A994</b> | ER membrane protein complex subunit 1                | 101.26 | + | - |
| <b>B5DF57</b> | Erythrocyte membrane protein band 4.2                | 53.9   | + | - |
| <b>P56571</b> | ES1 protein homolog, mitochondrial                   | 199.96 | + | - |
| <b>Q4G061</b> | Eukaryotic translation initiation factor 3 subunit B | 40.92  | - | + |
| <b>P24942</b> | Excitatory amino acid transporter 1                  | 104.54 | + | - |
| <b>P31596</b> | Excitatory amino acid transporter 2                  | 182.18 | + | - |
| <b>Q5XI32</b> | F-actin-capping protein subunit beta                 | 839.91 | + | - |
| <b>D3ZW60</b> | Family with sequence similarity 179, member B        | 32.97  | + | - |
| <b>D3ZPE2</b> | Family with sequence similarity 222, member B        | 120.37 | + | - |
| <b>D3ZH34</b> | Family with sequence similarity 46, member A         | 83.79  | - | + |
| <b>B0BN65</b> | Family with sequence similarity 49, member A         | 108.17 | + | - |
| <b>D3ZX03</b> | Fanconi anemia core complex-associated protein 100   | 129.62 | + | - |
| <b>G3V774</b> | F-box only protein 2                                 | 251.11 | - | + |
| <b>D3ZFK8</b> | FERM, ARH/RhoGEF and pleckstrin domain protein 2     | 96.25  | + | - |
| <b>F1LTM1</b> | Ferritin                                             | 155.36 | + | - |
| <b>F8WG20</b> | First gene upstream of Nt5dc3                        | 126.88 | + | - |
| <b>D3ZJ81</b> | Follistatin-like 4                                   | 81.95  | - | + |
| <b>D4A433</b> | Forkhead box O4                                      | 73.66  | - | + |
| <b>D4A4Y9</b> | Formin 1                                             | 62.14  | - | + |
| <b>D3ZX41</b> | Formyl peptide receptor,-related sequence 3          | 147.8  | + | - |
| <b>P00884</b> | Fructose-bisphosphate aldolase B                     | 154.3  | + | - |
| <b>P25093</b> | Fumarylacetoacetase                                  | 128.33 | + | - |



|                   |                                                                       |        |   |   |
|-------------------|-----------------------------------------------------------------------|--------|---|---|
| <b>F1LU70</b>     | G patch domain containing 1 (Predicted), isoform CRA_a                | 86.32  | - | + |
| <b>P11762</b>     | Galectin-1                                                            | 394.58 | + | - |
| <b>Q62847</b>     | Gamma-adducin                                                         | 57.52  | + | - |
| <b>F1M498</b>     | Gastrokine 3                                                          | 187.55 | + | - |
| <b>Q6AY96</b>     | General transcription factor IIF subunit 1                            | 105.48 | - | + |
| <b>D3ZD80</b>     | General transcription factor IIIC subunit 4                           | 48.99  | - | + |
| <b>Q6QLN3</b>     | Glioma tumor suppressor candidate region gene 2                       | 139.47 | + | - |
| <b>B5DEZ6</b>     | Glucosamine-6-phosphate isomerase                                     | 152.66 | + | - |
| <b>Q6TXE9</b>     | Glutamyl-prolyl-tRNA synthetase                                       | 41.5   | - | + |
| <b>D4ADD7</b>     | Glutaredoxin 5                                                        | 321.83 | + | - |
| <b>F7F2H5</b>     | Glutathione S-transferase                                             | 91.39  | - | + |
| <b>P00502</b>     | Glutathione S-transferase alpha-1                                     | 91.39  | - | + |
| <b>P04903</b>     | Glutathione S-transferase alpha-2                                     | 91.39  | - | + |
| <b>P04904</b>     | Glutathione S-transferase alpha-3                                     | 91.39  | - | + |
| <b>Q9Z1B2</b>     | Glutathione S-transferase Mu 5                                        | 75.42  | - | + |
| <b>A0A096MJ04</b> | Glutathione S-transferase omega 1, isoform CRA_a                      | 113.08 | + | - |
| <b>Q6AXR6</b>     | Glutathione S-transferase omega 1, isoform CRA_b                      | 234.44 | + | - |
| <b>Q9Z339</b>     | Glutathione S-transferase omega-1                                     | 234.44 | + | - |
| <b>A0A0G2JTY5</b> | Glutathione S-transferase omega-2                                     | 121.36 | + | - |
| <b>F1LNI0</b>     | Glycerol-3-phosphate dehydrogenase                                    | 142.38 | + | - |
| <b>P35571</b>     | Glycerol-3-phosphate dehydrogenase, mitochondrial                     | 142.38 | + | - |
| <b>B1H250</b>     | Glycine-N-acyltransferase-like 1                                      | 91.23  | - | + |
| <b>A0A0G2JXP1</b> | Glycogenin-1                                                          | 157.77 | - | + |
| <b>D3ZJB2</b>     | Glycoprotein integral membrane 1                                      | 248.19 | - | + |
| <b>G3V8B1</b>     | Glycosylphosphatidylinositol specific phospholipase D1, isoform CRA_a | 107.14 | - | + |
| <b>A0A0H2UHS9</b> | GRAM domain containing 1A, isoform CRA_a                              | 58.28  | + | - |
| <b>Q3KR56</b>     | GRAM domain-containing protein 1A                                     | 59.71  | + | - |
| <b>P62994</b>     | Growth factor receptor-bound protein 2                                | 460.34 | - | + |

|                   |                                                                            |        |   |   |
|-------------------|----------------------------------------------------------------------------|--------|---|---|
| <b>A0A0G2K665</b> | GTPase-activating protein testicular GAP1                                  | 69.29  | + | - |
| <b>A0A0G2JX90</b> | GTPase-activating Rap/RanGAP domain-like 3                                 | 109.05 | - | + |
| <b>P62828</b>     | GTP-binding nuclear protein Ran                                            | 314.94 | - | + |
| <b>Q8K586</b>     | GTP-binding nuclear protein Ran, testis-specific isoform                   | 115.73 | - | + |
| <b>Q63942</b>     | GTP-binding protein Rab-3D                                                 | 798.01 | + | - |
| <b>P20595</b>     | Guanylate cyclase soluble subunit beta-1                                   | 125.39 | - | + |
| <b>Q6AYR6</b>     | Haloacid dehalogenase-like hydrolase domain-containing protein 2           | 282.7  | + | - |
| <b>D3ZC55</b>     | Heat shock 70kDa protein 12A (Predicted), isoform CRA_a                    | 122.08 | - | + |
| <b>B4F772</b>     | Heat shock 70kDa protein 4-like (Predicted), isoform CRA_b                 | 75.22  | - | + |
| <b>A0A0G2JTT6</b> | HECT and RLD domain-containing E3 ubiquitin protein ligase family member 1 | 114.94 | + | - |
| <b>D3ZLS5</b>     | HECT domain E3 ubiquitin protein ligase 1                                  | 120.97 | + | - |
| <b>D4ADZ6</b>     | Helicase with zinc finger                                                  | 120.01 | + | - |
| <b>P23711</b>     | Heme oxygenase 2                                                           | 102.3  | + | - |
| <b>D4A6A2</b>     | Heterogeneous nuclear ribonucleoprotein A3                                 | 247.64 | + | - |
| <b>Q794E4</b>     | Heterogeneous nuclear ribonucleoprotein F                                  | 113.7  | - | + |
| <b>G3V9Q3</b>     | Heterogeneous nuclear ribonucleoprotein H                                  | 134.98 | - | + |
| <b>Q6AY09</b>     | Heterogeneous nuclear ribonucleoprotein H2                                 | 134.98 | - | + |
| <b>P05708</b>     | Hexokinase-1                                                               | 200.11 | + | - |
| <b>D4A0C3</b>     | HID1 domain-containing                                                     | 85.49  | - | + |
| <b>B2GV65</b>     | HIG1 domain family, member 2A                                              | 305.69 | - | + |
| <b>D3ZU87</b>     | HIG1 hypoxia inducible domain family, member 2A-like 1                     | 217.83 | - | + |
| <b>P63159</b>     | High mobility group protein B1                                             | 151.7  | - | + |
| <b>D3ZCR3</b>     | High-mobility group (nonhistone chromosomal) protein 1-like 1              | 151.7  | - | + |
| <b>Q569C4</b>     | Histone deacetylase 10                                                     | 84.49  | - | + |
| <b>F1MAL8</b>     | HMG-box containing 3                                                       | 70.96  | + | - |
| <b>D4AA38</b>     | Holocarboxylase synthetase                                                 | 105.79 | - | + |
| <b>G3V6Y1</b>     | Homeo box B8 (Mapped)                                                      | 257.76 | - | + |
| <b>A6YP92</b>     | Homeobox protein ARX                                                       | 170.39 | - | + |

|                   |                                                              |        |   |   |
|-------------------|--------------------------------------------------------------|--------|---|---|
| <b>P18863</b>     | Homeobox protein Hox-B8                                      | 257.76 | - | + |
| <b>P18866</b>     | Homeobox protein Hox-C8                                      | 257.76 | - | + |
| <b>D4A8N6</b>     | Hypothetical protein LOC690422                               | 139.63 | - | + |
| <b>P27605</b>     | Hypoxanthine-guanine phosphoribosyltransferase               | 240.78 | + | - |
| <b>P20760</b>     | Ig gamma-2A chain C region                                   | 197.4  | + | - |
| <b>Q6IE24</b>     | Inactive ubiquitin carboxyl-terminal hydrolase 54            | 46.05  | - | + |
| <b>D3ZN51</b>     | Integrin subunit alpha 9                                     | 80.46  | - | + |
| <b>M0R9Z5</b>     | Interferon regulatory factor 2-binding protein 2             | 60.78  | - | + |
| <b>Q4V797</b>     | Interferon-gamma-inducible GTPase Ifgga1 protein             | 168.28 | - | + |
| <b>Q5FVQ6</b>     | Interferon-gamma-inducible GTPase Ifgga3 protein             | 187.13 | - | + |
| <b>M0RAS6</b>     | Interferon-inducible GTPase 1-like                           | 187.13 | - | + |
| <b>B2RYH5</b>     | Interleukin-1 receptor-associated kinase 1                   | 95.69  | + | - |
| <b>D3ZBV8</b>     | Interleukin-1 receptor-associated kinase 1-binding protein 1 | 117.09 | - | + |
| <b>G3V760</b>     | Intestinal cell kinase, isoform CRA_a                        | 116.8  | + | - |
| <b>A0A0G2JVF8</b> | Intraflagellar transport protein 172 homolog                 | 131.56 | - | + |
| <b>Q8VI04</b>     | Isoaspartyl peptidase/L-asparaginase                         | 269.31 | + | - |
| <b>A0A0G2JZH2</b> | Isoleucine--tRNA ligase, cytoplasmic-like                    | 209.7  | + | - |
| <b>F1LS86</b>     | Isoleucine-tRNA synthetase (Predicted)                       | 231.25 | + | - |
| <b>A0A0G2JVL8</b> | Isoleucyl-tRNA synthetase                                    | 231.25 | + | - |
| <b>D4A1C2</b>     | Junction adhesion molecule-like                              | 83.75  | - | + |
| <b>F1M5A4</b>     | Katanin p60 ATPase-containing subunit A-like 2               | 146.69 | + | - |
| <b>P57790</b>     | Kelch-like ECH-associated protein 1                          | 67.9   | - | + |
| <b>A0A096MJ07</b> | Keratin, type I cytoskeletal 9                               | 156.81 | - | + |
| <b>A0A0G2K509</b> | Keratin, type II cytoskeletal 5                              | 108.7  | - | + |
| <b>M0RD15</b>     | Keratin-associated protein 27-1                              | 140.31 | - | + |
| <b>Q9EQG6</b>     | Kinase D-interacting substrate of 220 kDa                    | 59.85  | + | - |
| <b>Q70AM4</b>     | Kinesin 13B                                                  | 52.29  | + | - |
| <b>A0A0G2K8Z9</b> | Kinesin family member 13B                                    | 52.29  | + | - |

|                   |                                                                             |        |   |   |
|-------------------|-----------------------------------------------------------------------------|--------|---|---|
| <b>F1M4A4</b>     | Kinesin family member 1A                                                    | 48.5   | - | + |
| <b>Q2PQA9</b>     | Kinesin-1 heavy chain                                                       | 92.47  | + | - |
| <b>D3ZI07</b>     | Kinesin-like protein                                                        | 114.63 | + | - |
| <b>Q62909</b>     | Kinesin-like protein KIF2C                                                  | 90.33  | - | + |
| <b>G3V8Z6</b>     | KRIT1, ankyrin repeat-containing                                            | 91.33  | + | - |
| <b>D4AC69</b>     | Leishmanolysin-like (Metallopeptidase M8 family) (Predicted), isoform CRA_a | 46.85  | + | - |
| <b>B1H234</b>     | Leucine-rich repeat transmembrane protein FLRT3                             | 153.8  | + | - |
| <b>Q5FVI3</b>     | Leucine-rich repeat-containing protein 57                                   | 128.28 | + | - |
| <b>F8WFF9</b>     | Leucine-rich repeat-containing protein 57-like                              | 110.4  | + | - |
| <b>Q66H93</b>     | LOC100125386 protein                                                        | 795.65 | + | - |
| <b>D3ZX48</b>     | LON peptidase N-terminal domain and ring finger 2                           | 105.26 | - | + |
| <b>Q66H35</b>     | Lung adenoma susceptibility protein 2 homolog                               | 102.18 | - | + |
| <b>Q5XI99</b>     | Lysosome-associated membrane glycoprotein 3                                 | 91.07  | - | + |
| <b>Q00495</b>     | Macrophage colony-stimulating factor 1 receptor                             | 39.75  | + | - |
| <b>F1M5N4</b>     | Malic enzyme                                                                | 171.15 | + | - |
| <b>G3V742</b>     | Matrix metalloproteinase                                                    | 48.9   | - | + |
| <b>A1EC81</b>     | Matrix metalloproteinase 28                                                 | 164.3  | - | + |
| <b>D3ZVH5</b>     | MDM2 proto-oncogene                                                         | 97.21  | - | + |
| <b>P41243</b>     | Megakaryocyte-associated tyrosine-protein kinase                            | 129.25 | + | - |
| <b>F1M6Z3</b>     | Melanoma antigen preferentially-expressed in tumors-like                    | 169.19 | + | - |
| <b>A0A0G2KA58</b> | Melanoma inhibitory activity 2                                              | 102.98 | + | - |
| <b>A0A0U1RS09</b> | Microtubule-associated protein 2                                            | 273.37 | + | - |
| <b>Q6XVN8</b>     | Microtubule-associated proteins 1A/1B light chain 3A                        | 417.97 | - | + |
| <b>A0A0G2K9L9</b> | Midasin AAA ATPase 1                                                        | 92     | - | + |
| <b>A0A0G2K5W5</b> | MINDY lysine 48 deubiquitinase 4B, pseudogene                               | 100.02 | + | - |
| <b>P84817</b>     | Mitochondrial fission 1 protein                                             | 307.92 | - | + |
| <b>Q5FVG4</b>     | Mitochondrial glutamate carrier 1-like                                      | 122.46 | + | - |
| <b>Q505J6</b>     | Mitochondrial glutamate carrier 2                                           | 137.34 | + | - |

|                   |                                                                           |        |   |   |
|-------------------|---------------------------------------------------------------------------|--------|---|---|
| <b>D3ZPN5</b>     | Mitochondrial poly(A) polymerase                                          | 126.77 | - | + |
| <b>Q66H23</b>     | Mitoferrin-1                                                              | 156.12 | + | - |
| <b>P63086</b>     | Mitogen-activated protein kinase 1                                        | 112.38 | + | - |
| <b>P21708</b>     | Mitogen-activated protein kinase 3                                        | 141.63 | + | - |
| <b>G3V9J9</b>     | Mitogen-activated protein kinase 4                                        | 157.98 | + | - |
| <b>P27704</b>     | Mitogen-activated protein kinase 6                                        | 35.23  | + | - |
| <b>G3V840</b>     | Mitogen-activated protein kinase kinase kinase 8                          | 109.65 | - | + |
| <b>D3Z899</b>     | Mitoguardin 2                                                             | 155.54 | + | - |
| <b>D4AAP6</b>     | MN1 proto-oncogene, transcriptional regulator                             | 89.09  | + | - |
| <b>Q6Y306</b>     | Multidrug resistance-associated protein 9                                 | 58.24  | - | + |
| <b>D4A1Q3</b>     | Myb/SANT DNA-binding domain-containing 1                                  | 156.63 | + | - |
| <b>Q69CM7</b>     | MYCBP-associated protein                                                  | 68.39  | - | + |
| <b>P07722</b>     | Myelin-associated glycoprotein                                            | 204.93 | + | - |
| <b>Q63345</b>     | Myelin-oligodendrocyte glycoprotein                                       | 237.62 | + | - |
| <b>Q9R1J4</b>     | Myocilin                                                                  | 169.24 | - | + |
| <b>A0A0G2K5P5</b> | Myomesin 1                                                                | 119.94 | + | - |
| <b>F1LMU0</b>     | Myosin heavy chain 1                                                      | 42.65  | + | - |
| <b>A0A0G2K2W5</b> | Myosin light chain 7                                                      | 124.18 | - | + |
| <b>Q64122</b>     | Myosin regulatory light polypeptide 9                                     | 76.42  | - | + |
| <b>Q29RW1</b>     | Myosin-4                                                                  | 44.75  | + | - |
| <b>B2RYX0</b>     | Naca protein                                                              | 108.02 | + | - |
| <b>B0BNE6</b>     | NADH dehydrogenase (Ubiquinone) Fe-S protein 8 (Predicted), isoform CRA_a | 96.21  | + | - |
| <b>G3V644</b>     | NADH dehydrogenase (Ubiquinone) flavoprotein 3-like, isoform CRA_a        | 157.77 | - | + |
| <b>Q6PCU8</b>     | NADH dehydrogenase [ubiquinone] flavoprotein 3, mitochondrial             | 384.96 | - | + |
| <b>Q641Y2</b>     | NADH dehydrogenase [ubiquinone] iron-sulfur protein 2, mitochondrial      | 165.83 | + | - |
| <b>Q5XIF3</b>     | NADH dehydrogenase [ubiquinone] iron-sulfur protein 4, mitochondrial      | 108.11 | - | + |
| <b>P52504</b>     | NADH dehydrogenase [ubiquinone] iron-sulfur protein 6, mitochondrial      | 748.22 | - | + |
| <b>D4A1F8</b>     | Nanos C2HC-type zinc finger 1                                             | 150.55 | + | - |

|                   |                                                                                                         |        |   |   |
|-------------------|---------------------------------------------------------------------------------------------------------|--------|---|---|
| <b>A0A0G2K1B7</b> | NEDD4 binding protein 2-like 1                                                                          | 260.02 | - | + |
| <b>D4A1D7</b>     | Neurexophilin and PC-esterase domain family, member 2                                                   | 93     | - | + |
| <b>O35095</b>     | Neurochondrin                                                                                           | 215.49 | + | - |
| <b>P97685</b>     | Neurofascin                                                                                             | 41.07  | - | + |
| <b>Q9WU34</b>     | Neuronal-specific septin-3                                                                              | 334.4  | - | + |
| <b>F1LP80</b>     | Neurosecretory protein VGF                                                                              | 240.33 | - | + |
| <b>A7E3N2</b>     | Neutrophil cytosol factor 2                                                                             | 119.66 | - | + |
| <b>Q80Z29</b>     | Nicotinamide phosphoribosyltransferase                                                                  | 62.76  | + | - |
| <b>G3V6L2</b>     | NIMA-related kinase 2                                                                                   | 99.84  | + | - |
| <b>P29476</b>     | Nitric oxide synthase, brain                                                                            | 60.24  | - | + |
| <b>B1H280</b>     | NK2 homeobox 6                                                                                          | 116.94 | - | + |
| <b>D3ZKI9</b>     | NOP9 nucleolar protein                                                                                  | 62.29  | - | + |
| <b>O35987</b>     | NSFL1 cofactor p47                                                                                      | 234.34 | - | + |
| <b>D3ZU59</b>     | Nuclear factor of activated T-cells, cytoplasmic, calcineurin-dependent 3<br>(Predicted), isoform CRA_a | 101.62 | - | + |
| <b>Q9EPU2</b>     | Nuclear receptor coactivator 3                                                                          | 55.34  | - | + |
| <b>Q6AYD9</b>     | Nucleoside diphosphate-linked moiety X motif 19                                                         | 100.13 | - | + |
| <b>P70563</b>     | Nucleoside diphosphate-linked moiety X motif 6                                                          | 128.63 | - | + |
| <b>A0A0G2K226</b> | NudC domain-containing 3                                                                                | 314.58 | - | + |
| <b>D4A232</b>     | Olfactory receptor                                                                                      | 194.13 | + | - |
| <b>Q56A26</b>     | Oligodendrocytic myelin paranodal and inner loop protein                                                | 284.8  | + | - |
| <b>Q8R5M4</b>     | Optineurin                                                                                              | 113.87 | - | + |
| <b>D4A6R6</b>     | Otoancorin                                                                                              | 99.41  | + | - |
| <b>D3ZUC9</b>     | Oxidative-stress responsive 1 (Predicted)                                                               | 181.71 | - | + |
| <b>P63014</b>     | Paired mesoderm homeobox protein 1                                                                      | 299.16 | - | + |
| <b>Q32PZ0</b>     | PAK1-interacting protein 1                                                                              | 101.25 | + | - |
| <b>P04550</b>     | Parathymosin                                                                                            | 398.02 | - | + |
| <b>Q5PQT0</b>     | PAS domain containing serine/threonine kinase, isoform CRA_a                                            | 45.2   | + | - |

|               |                                                                                 |        |   |   |
|---------------|---------------------------------------------------------------------------------|--------|---|---|
| <b>Q4V8F6</b> | Pcbp2 protein                                                                   | 135.67 | + | - |
| <b>F1LPA6</b> | Peptidyl arginine deiminase, type II, isoform CRA_a                             | 66.41  | + | - |
| <b>D3ZUZ9</b> | Peptidyl-prolyl cis-trans isomerase                                             | 167.27 | - | + |
| <b>D3ZMY8</b> | Pericentrin                                                                     | 73.32  | - | + |
| <b>M0RA08</b> | Perilipin                                                                       | 82.67  | - | + |
| <b>Q6IRH6</b> | Phosphate carrier protein, mitochondrial                                        | 150.02 | + | - |
| <b>Q6IMX4</b> | Phosphatidic acid phosphatase type 2B                                           | 118.5  | + | - |
| <b>Q8R2H5</b> | Phosphatidylinositol-glycan-specific phospholipase D                            | 107.14 | - | + |
| <b>G3V7V8</b> | Phosphodiesterase                                                               | 82.35  | - | + |
| <b>Q499Q4</b> | Phosphoglucomutase-1                                                            | 256.17 | + | - |
| <b>D4A4M4</b> | Phosphoinositide-interacting regulator of transient receptor potential channels | 188.24 | - | + |
| <b>D3ZA44</b> | Phospholipase A2, group IIE                                                     | 473.97 | + | - |
| <b>Q5FVH2</b> | Phospholipase D3                                                                | 97.59  | + | - |
| <b>E9PSV5</b> | Phosphoserine aminotransferase                                                  | 188.21 | - | + |
| <b>P63004</b> | Platelet-activating factor acetylhydrolase IB subunit alpha                     | 201.16 | + | - |
| <b>D4A2Q3</b> | Pleckstrin and Sec7 domain-containing 3                                         | 92.29  | - | + |
| <b>D3ZW91</b> | POC1 centriolar protein homolog B                                               | 88.78  | + | - |
| <b>Q6AYU5</b> | Poly(rC)-binding protein 2                                                      | 135.67 | + | - |
| <b>Q6AY48</b> | Poly(rC)-binding protein 3                                                      | 135.67 | + | - |
| <b>B4F7D3</b> | Polymerase (RNA) III (DNA directed) polypeptide G (32kD)-like                   | 235.94 | - | + |
| <b>Q66H20</b> | Polypyrimidine tract-binding protein 2                                          | 210.48 | - | + |
| <b>Q9JK96</b> | Potassium voltage-gated channel subfamily KQT member 4                          | 88.97  | + | - |
| <b>O88758</b> | Potassium voltage-gated channel subfamily S member 1                            | 120.75 | - | + |
| <b>P09626</b> | Potassium-transporting ATPase alpha chain 1                                     | 169.91 | + | - |
| <b>B1WCA0</b> | Ppm1d protein                                                                   | 49.33  | - | + |
| <b>D3ZP38</b> | Predicted gene 1758                                                             | 240.86 | + | - |
| <b>Q64060</b> | Probable ATP-dependent RNA helicase DDX4                                        | 165.04 | + | - |
| <b>F7FA48</b> | Progesterone receptor                                                           | 159.9  | + | - |

|                   |                                                                                |        |   |   |
|-------------------|--------------------------------------------------------------------------------|--------|---|---|
| <b>F7EPE0</b>     | Prosaposin                                                                     | 155.98 | - | + |
| <b>D4AE56</b>     | Prostaglandin E synthase 2                                                     | 72.89  | - | + |
| <b>P83868</b>     | Prostaglandin E synthase 3                                                     | 292.53 | - | + |
| <b>P35355</b>     | Prostaglandin G/H synthase 2                                                   | 45.56  | + | - |
| <b>F1M6I7</b>     | Proteasome subunit alpha type                                                  | 288.76 | - | + |
| <b>P17220</b>     | Proteasome subunit alpha type-2                                                | 194.94 | - | + |
| <b>P48004</b>     | Proteasome subunit alpha type-7                                                | 158.59 | - | + |
| <b>Q6PDW4</b>     | Proteasome subunit beta type                                                   | 110.34 | - | + |
| <b>P18421</b>     | Proteasome subunit beta type-1                                                 | 118.36 | - | + |
| <b>Q6MGD0</b>     | Protein CutA                                                                   | 416.8  | - | + |
| <b>Q6AYM4</b>     | Protein DPCD                                                                   | 265.4  | + | - |
| <b>F1LS98</b>     | Protein kinase C                                                               | 131.56 | + | - |
| <b>P05696</b>     | Protein kinase C alpha type                                                    | 131.56 | + | - |
| <b>P68403</b>     | Protein kinase C beta type                                                     | 106.29 | + | - |
| <b>P63319</b>     | Protein kinase C gamma type                                                    | 150.02 | + | - |
| <b>G3V9L2</b>     | Protein kinase LYK5, isoform CRA_c                                             | 169.22 | + | - |
| <b>Q8K3F3</b>     | Protein phosphatase 1 regulatory subunit 14B                                   | 278.55 | + | - |
| <b>Q66HR9</b>     | Protein phosphatase 1 regulatory subunit 32                                    | 100.64 | + | - |
| <b>P0C7L8</b>     | Protein phosphatase 1 regulatory subunit 3E                                    | 333.76 | + | - |
| <b>Q5HZV9</b>     | Protein phosphatase 1 regulatory subunit 7                                     | 762.39 | - | + |
| <b>A0A0G2JV26</b> | Protein phosphatase 4, regulatory subunit 4                                    | 149.08 | + | - |
| <b>B0BMY7</b>     | Protein tyrosine kinase 9-like (A6-related protein) (Predicted), isoform CRA_b | 110.91 | + | - |
| <b>D4A497</b>     | Protocadherin 11 X-linked                                                      | 68.2   | + | - |
| <b>Q68HB8</b>     | Protocadherin 7                                                                | 82.84  | - | + |
| <b>Q63132</b>     | Proto-oncogene tyrosine-protein kinase ROS                                     | 35.23  | + | - |
| <b>D3ZM38</b>     | Putative uncharacterized protein RGD1565972_predicted                          | 92.1   | - | + |
| <b>F7EPH4</b>     | Pyrophosphatase (inorganic) 1                                                  | 157.69 | - | + |
| <b>P52873</b>     | Pyruvate carboxylase, mitochondrial                                            | 106.88 | - | + |



|                   |                                               |        |   |   |
|-------------------|-----------------------------------------------|--------|---|---|
| <b>Q5RKJ9</b>     | RAB10, member RAS oncogene family             | 798.01 | + | - |
| <b>A0A0G2JYK2</b> | Rab11 family-interacting protein 1            | 144.46 | + | - |
| <b>B0BMW0</b>     | RAB14, member RAS oncogene family             | 864.64 | + | - |
| <b>E9PU16</b>     | RAB1A, member RAS oncogene family             | 798.01 | + | - |
| <b>G3V6H0</b>     | RAB1B, member RAS oncogene family-like        | 798.01 | + | - |
| <b>A0A0G2JTT4</b> | RAB30, member RAS oncogene family             | 914.26 | + | - |
| <b>F1LW77</b>     | RAB33B, member RAS oncogene family            | 180.14 | + | - |
| <b>D4A0G7</b>     | RAB37, member RAS oncogene family             | 798.01 | + | - |
| <b>D3ZZP2</b>     | RAB39, member RAS oncogene family (Predicted) | 179.48 | + | - |
| <b>F1LVC3</b>     | RAB6B, member RAS oncogene family             | 179.48 | + | - |
| <b>D4ADQ7</b>     | RAD21 cohesin complex component-like 1        | 79.76  | - | + |
| <b>Q62796</b>     | RalA-binding protein 1                        | 50.82  | - | + |
| <b>D4A2G9</b>     | RAN-binding protein 1                         | 431.08 | - | + |
| <b>Q9QYJ2</b>     | Ras GTPase-activating protein 3               | 128.92 | + | - |
| <b>Q63486</b>     | Ras-related GTP-binding protein A             | 44.41  | + | - |
| <b>Q63487</b>     | Ras-related GTP-binding protein B             | 126.57 | + | - |
| <b>P35281</b>     | Ras-related protein Rab-10                    | 798.01 | + | - |
| <b>P35284</b>     | Ras-related protein Rab-12                    | 798.01 | + | - |
| <b>P61107</b>     | Ras-related protein Rab-14                    | 864.64 | + | - |
| <b>P35289</b>     | Ras-related protein Rab-15                    | 801.55 | + | - |
| <b>Q6NYB7</b>     | Ras-related protein Rab-1A                    | 798.01 | + | - |
| <b>P10536</b>     | Ras-related protein Rab-1B                    | 798.01 | + | - |
| <b>P51156</b>     | Ras-related protein Rab-26                    | 798.01 | + | - |
| <b>Q5U316</b>     | Ras-related protein Rab-35                    | 798.01 | + | - |
| <b>P63012</b>     | Ras-related protein Rab-3A                    | 798.01 | + | - |
| <b>Q63941</b>     | Ras-related protein Rab-3B                    | 798.01 | + | - |
| <b>P62824</b>     | Ras-related protein Rab-3C                    | 798.01 | + | - |
| <b>Q53B90</b>     | Ras-related protein Rab-43                    | 798.01 | + | - |

|                   |                                                           |        |   |   |
|-------------------|-----------------------------------------------------------|--------|---|---|
| <b>P05714</b>     | Ras-related protein Rab-4A                                | 918.58 | + | - |
| <b>P51146</b>     | Ras-related protein Rab-4B                                | 798.01 | + | - |
| <b>Q9WVB1</b>     | Ras-related protein Rab-6A                                | 179.48 | + | - |
| <b>P35280</b>     | Ras-related protein Rab-8A                                | 798.01 | + | - |
| <b>P70550</b>     | Ras-related protein Rab-8B                                | 798.01 | + | - |
| <b>D3Z9I5</b>     | RCG25530, isoform CRA_c                                   | 69.63  | - | + |
| <b>D4A1L6</b>     | RCG26910, isoform CRA_b                                   | 163.09 | + | - |
| <b>D4AEF5</b>     | RCG31107                                                  | 50.23  | - | + |
| <b>B0BNM4</b>     | RCG33221, isoform CRA_c                                   | 152.24 | - | + |
| <b>A0A0H2UHP9</b> | RCG39700, isoform CRA_d                                   | 179.48 | + | - |
| <b>D4AEK4</b>     | RCG49713                                                  | 97.63  | - | + |
| <b>D3ZGZ4</b>     | RCG49718                                                  | 85.04  | - | + |
| <b>Q1KMU0</b>     | RCG52183                                                  | 43.56  | + | - |
| <b>F1LYG2</b>     | RCG54282                                                  | 63.52  | - | + |
| <b>D4A3D2</b>     | RCG56113, isoform CRA_a                                   | 148.23 | + | - |
| <b>D3Z8H5</b>     | RCG65904-like                                             | 58     | + | - |
| <b>Q9Z2P5</b>     | Receptor-interacting serine/threonine-protein kinase 3    | 72.04  | - | + |
| <b>A0A0G2JYG7</b> | Receptor-type tyrosine-protein phosphatase R              | 112.2  | + | - |
| <b>O70521</b>     | Regulator of G-protein signaling 19                       | 220.18 | + | - |
| <b>E9PT49</b>     | Regulatory factor X, 7                                    | 87.48  | - | + |
| <b>B4F778</b>     | Replication factor C (Activator 1) 4 (Predicted), isoform | 100.14 | - | + |
| <b>B5DF29</b>     | Replication factor C (Activator 1) 5                      | 92.36  | - | + |
| <b>Q64548</b>     | Reticulon-1                                               | 122.75 | + | - |
| <b>Q4KM26</b>     | RGD1311345 protein                                        | 265.21 | + | - |
| <b>D4A5K8</b>     | RGD1559600                                                | 396.03 | + | - |
| <b>A1A5Q3</b>     | RGD1560775 protein                                        | 145.48 | + | - |
| <b>A0A0H2UHP2</b> | RGD1561415                                                | 188.19 | + | - |
| <b>B2RYG3</b>     | RGD1565149 protein                                        | 108.78 | + | - |

|                   |                                                        |        |   |   |
|-------------------|--------------------------------------------------------|--------|---|---|
| <b>A2VD15</b>     | RGD1566036 protein                                     | 135.64 | + | - |
| <b>Q5FVG9</b>     | Rho family GTPase 1                                    | 146.48 | + | - |
| <b>M0R5V4</b>     | Rho GTPase-activating protein 19                       | 80.1   | - | + |
| <b>F1LUU6</b>     | Rho guanine nucleotide exchange factor 38              | 61.06  | - | + |
| <b>D3ZN03</b>     | Ribosomal protein P2-like                              | 103.06 | + | - |
| <b>D3Z8E0</b>     | Ribosomal protein S6 kinase                            | 59.34  | + | - |
| <b>D3ZY39</b>     | Ribosomal RNA-processing 1B                            | 128.7  | + | - |
| <b>D3ZXH1</b>     | RIKEN cDNA 2310003L06 gene                             | 63.07  | - | + |
| <b>D3ZYQ9</b>     | Ring finger protein 20                                 | 39.42  | + | - |
| <b>D3ZRG6</b>     | Ring finger protein 6                                  | 119.8  | - | + |
| <b>D3ZND9</b>     | RIO kinase 3                                           | 157.11 | + | - |
| <b>A0A0G2KAG6</b> | RNA polymerase III subunit G-like                      | 235.94 | - | + |
| <b>Q68FS8</b>     | RNA terminal phosphate cyclase domain 1                | 157.88 | - | + |
| <b>A0A0G2K1R3</b> | Scaffolding protein involved in DNA repair             | 126.22 | + | - |
| <b>B5DFD3</b>     | Schip1 protein                                         | 49.88  | + | - |
| <b>D4A2D6</b>     | Schlafen 2                                             | 209.71 | + | - |
| <b>D3ZHJ3</b>     | Semaphorin 3B                                          | 94.95  | + | - |
| <b>A0JN02</b>     | Sept4 protein                                          | 180.16 | + | - |
| <b>E9PST0</b>     | Septin 4                                               | 180.16 | + | - |
| <b>D4A2H2</b>     | Serine palmitoyltransferase, long chain base subunit 1 | 76.8   | - | + |
| <b>D3ZKU3</b>     | Serine/threonine kinase 35                             | 113.29 | + | - |
| <b>D4A648</b>     | Serine/threonine kinase 4                              | 112.51 | + | - |
| <b>O08875</b>     | Serine/threonine-protein kinase DCLK1                  | 212.87 | + | - |
| <b>Q62726</b>     | Serine/threonine-protein kinase ICK                    | 116.8  | + | - |
| <b>P35465</b>     | Serine/threonine-protein kinase PAK 1                  | 243.67 | - | + |
| <b>Q64303</b>     | Serine/threonine-protein kinase PAK 2                  | 158.43 | - | + |
| <b>Q62829</b>     | Serine/threonine-protein kinase PAK 3                  | 154.37 | - | + |
| <b>G3V8M5</b>     | Serine/threonine-protein phosphatase                   | 112.53 | - | + |

|                   |                                                                                                             |        |   |   |
|-------------------|-------------------------------------------------------------------------------------------------------------|--------|---|---|
| <b>A0A0G2K5X0</b> | Serine/threonine-protein phosphatase 2A 55 kDa regulatory subunit B                                         | 281.04 | + | - |
| <b>P97888</b>     | Serine/threonine-protein phosphatase 2A 55 kDa regulatory subunit B gamma isoform                           | 281.04 | + | - |
| <b>Q4QQT4</b>     | Serine/threonine-protein phosphatase 2A 65 kDa regulatory subunit A beta isoform                            | 87.95  | - | + |
| <b>P63331</b>     | Serine/threonine-protein phosphatase 2A catalytic subunit alpha isoform                                     | 109.77 | + | - |
| <b>Q5BJ92</b>     | Serine/threonine-protein phosphatase 4 catalytic subunit                                                    | 112.53 | - | + |
| <b>Q6P799</b>     | Serine--tRNA ligase, cytoplasmic                                                                            | 71.88  | - | + |
| <b>D3ZHH8</b>     | Serum response factor                                                                                       | 71.24  | + | - |
| <b>Q9JLU4</b>     | SH3 and multiple ankyrin repeat domains protein 3                                                           | 148.57 | - | + |
| <b>D3ZPJ0</b>     | Shisa family member 7                                                                                       | 60.01  | - | + |
| <b>A0A0G2KAW2</b> | Signal-induced proliferation-associated 1 like 1, isoform CRA_b                                             | 88.72  | + | - |
| <b>O35412</b>     | Signal-induced proliferation-associated 1-like protein 1                                                    | 88.72  | + | - |
| <b>F1M611</b>     | Similar to 2610034M16Rik protein                                                                            | 143.33 | + | - |
| <b>D4A4D5</b>     | Similar to 60S acidic ribosomal protein P2                                                                  | 103.06 | + | - |
| <b>D3ZWL0</b>     | Similar to 60S ribosomal protein L32                                                                        | 156.25 | - | + |
| <b>F7FKF2</b>     | Similar to Ab1-351                                                                                          | 148.06 | - | + |
| <b>F7FM32</b>     | Similar to CG9752-PA                                                                                        | 265.21 | + | - |
| <b>D3ZY56</b>     | Similar to divalent cation tolerant protein CUTA                                                            | 328.44 | + | - |
| <b>M0R509</b>     | Similar to hypothetical protein C130079G13                                                                  | 82.56  | - | + |
| <b>F1LX85</b>     | Similar to K04F10.2                                                                                         | 62.63  | - | + |
| <b>F1LTP9</b>     | Similar to MAP/microtubule affinity-regulating kinase 4 (MAP/microtubule affinity-regulating kinase-like 1) | 154.77 | - | + |
| <b>D3ZHA7</b>     | Similar to Myosin light chain 1 slow a (Predicted)                                                          | 106.15 | + | - |
| <b>F1LVY7</b>     | Similar to RIKEN cDNA 4732496O08                                                                            | 85.54  | - | + |
| <b>A0A0G2K442</b> | Similar to RIKEN cDNA 4930579C12 gene                                                                       | 145.48 | + | - |
| <b>F1LTK7</b>     | Similar to sentrin 15                                                                                       | 161.51 | - | + |
| <b>D3ZMV1</b>     | Similar to Src-like adaptor protein-2 (Predicted)                                                           | 157.09 | - | + |
| <b>D4AA19</b>     | Similar to T-cell activation Rho GTPase-activating protein isoform b                                        | 163.11 | - | + |
| <b>D3ZJ47</b>     | Similar to UPF0258 protein KIAA1024                                                                         | 114.41 | + | - |

|                   |                                                         |        |   |   |
|-------------------|---------------------------------------------------------|--------|---|---|
| <b>D3ZLP9</b>     | Sin3A-associated protein 130                            | 168.15 | + | - |
| <b>G3V970</b>     | SIX homeobox 1                                          | 93.94  | - | + |
| <b>D4ABU3</b>     | SLAM family member 7                                    | 112.64 | + | - |
| <b>D3ZS24</b>     | SLAM family member 8                                    | 110.96 | - | + |
| <b>F1LQU9</b>     | Small G protein-signaling modulator 3                   | 174.32 | - | + |
| <b>F1LYZ6</b>     | Small nuclear RNA-activating complex, polypeptide 4     | 43.15  | + | - |
| <b>P60192</b>     | SNARE-associated protein Snapin                         | 415.08 | + | - |
| <b>Q63553</b>     | SNF-related serine/threonine-protein kinase             | 44.34  | + | - |
| <b>F1LRK1</b>     | Sodium/potassium-transporting ATPase subunit alpha      | 169.91 | + | - |
| <b>G3V8G0</b>     | Solute carrier family 12 member 3                       | 105.15 | - | + |
| <b>D3ZKX5</b>     | Solute carrier family 15, member 5                      | 161.65 | - | + |
| <b>F1LZW6</b>     | Solute carrier family 25 member 13                      | 132.24 | + | - |
| <b>D4A961</b>     | Solute carrier family 25, member 48                     | 186.06 | - | + |
| <b>G3V6S0</b>     | Spectrin beta chain                                     | 230.85 | + | - |
| <b>A0JPP4</b>     | Sperm equatorial segment protein 1                      | 107.69 | - | + |
| <b>D4A6T1</b>     | Spermatogenesis associated 5 (Predicted), isoform CRA_a | 96.67  | + | - |
| <b>A0A0G2K0I1</b> | Spermatogenesis-associated 5                            | 96.67  | + | - |
| <b>Q6PEC4</b>     | S-phase kinase-associated protein 1                     | 807.13 | - | + |
| <b>Q564G3</b>     | Sphingolipid delta(4)-desaturase/C4-monooxygenase DES2  | 295.2  | + | - |
| <b>A0A0G2K8K0</b> | Splicing factor proline and glutamine rich              | 140.13 | - | + |
| <b>Q9JKL7</b>     | Splicing regulatory glutamine/lysine-rich protein 1     | 123.02 | + | - |
| <b>A0A0G2KAV7</b> | SprT-like domain-containing protein Spartan             | 115.91 | - | + |
| <b>Q9QXY2</b>     | SRC kinase signaling inhibitor 1                        | 87.85  | - | + |
| <b>Q66HL2</b>     | Src substrate cortactin                                 | 253.81 | - | + |
| <b>Q9ET50</b>     | Staufen double-stranded RNA-binding protein 1           | 57.65  | + | - |
| <b>Q7TNZ6</b>     | STE20-related kinase adapter protein alpha              | 169.22 | + | - |
| <b>F1LN57</b>     | Sterile alpha motif domain-containing protein 14        | 113.24 | + | - |
| <b>Q64562</b>     | Steroid 21-hydroxylase                                  | 156.13 | + | - |

|                   |                                                                                         |         |   |   |
|-------------------|-----------------------------------------------------------------------------------------|---------|---|---|
| <b>P56720</b>     | Sterol regulatory element-binding protein 1                                             | 60.16   | + | - |
| <b>P70483</b>     | Striatin                                                                                | 64.71   | - | + |
| <b>F1LPV8</b>     | Succinate--CoA ligase [GDP-forming] subunit beta, mitochondrial                         | 329.47  | - | + |
| <b>P07825</b>     | Synaptophysin                                                                           | 2871.56 | + | - |
| <b>G3V6M3</b>     | Synaptotagmin II                                                                        | 132.14  | + | - |
| <b>P29101</b>     | Synaptotagmin-2                                                                         | 132.14  | + | - |
| <b>P47861</b>     | Synaptotagmin-5                                                                         | 158.37  | + | - |
| <b>F1LSG8</b>     | Syndetin                                                                                | 167.2   | - | + |
| <b>Q9Z158</b>     | Syntaxin-17                                                                             | 144.57  | + | - |
| <b>D3ZTQ2</b>     | T cell immunoreceptor with Ig and ITIM domains                                          | 204.79  | - | + |
| <b>D3ZA84</b>     | Talin 2                                                                                 | 122.2   | - | + |
| <b>D3ZN60</b>     | Tau tubulin kinase 1 (Predicted)                                                        | 115.02  | - | + |
| <b>A0A0G2JYZ1</b> | Tau tubulin kinase 2                                                                    | 115.02  | - | + |
| <b>Q7TST9</b>     | T-box transcription factor TBX3                                                         | 53.38   | - | + |
| <b>A0A0G2JYT7</b> | T-complex protein 10b                                                                   | 131.77  | + | - |
| <b>D3ZMN0</b>     | Testis specific gene A13 (Predicted)                                                    | 303.71  | + | - |
| <b>Q4V7F0</b>     | Tetratricopeptide repeat protein 23                                                     | 151.83  | - | + |
| <b>Q6P3V7</b>     | Tetratricopeptide repeat protein 41                                                     | 126.88  | + | - |
| <b>Q920J4</b>     | Thioredoxin-like protein 1                                                              | 142.68  | - | + |
| <b>Q80WE6</b>     | TNF superfamily member 9                                                                | 172.13  | + | - |
| <b>B1WC25</b>     | Tra2a protein                                                                           | 212.27  | + | - |
| <b>Q5XIC7</b>     | Transcription elongation factor A N-terminal and central domain-containing protein<br>2 | 118.21  | + | - |
| <b>D4A3I4</b>     | Transcription factor BTF3                                                               | 308.18  | - | + |
| <b>Q68A21</b>     | Transcriptional activator protein Pur-beta                                              | 417.57  | - | + |
| <b>Q64428</b>     | Trifunctional enzyme subunit alpha, mitochondrial                                       | 137.34  | + | - |
| <b>D3ZA88</b>     | Tripartite motif-containing 34                                                          | 119.83  | - | + |
| <b>D4A3L4</b>     | Tripartite motif-containing 6                                                           | 98.44   | + | - |

|                   |                                                            |        |   |   |
|-------------------|------------------------------------------------------------|--------|---|---|
| <b>D4A0T1</b>     | tRNA-dihydrouridine synthase                               | 50.46  | - | + |
| <b>Q642B1</b>     | TSPY-like 1                                                | 123.59 | - | + |
| <b>P22934</b>     | Tumor necrosis factor receptor superfamily member 1A       | 178.39 | + | - |
| <b>Q5FVG7</b>     | Tyrosine-protein kinase                                    | 87.04  | - | + |
| <b>P57097</b>     | Tyrosine-protein kinase Mer                                | 63.42  | - | + |
| <b>Q63159</b>     | Ubiquinone biosynthesis O-methyltransferase, mitochondrial | 259.6  | + | - |
| <b>B2GUX4</b>     | Ubiquitin carboxyl-terminal hydrolase 21                   | 108.84 | - | + |
| <b>Q4VSI4</b>     | Ubiquitin carboxyl-terminal hydrolase 7                    | 87.06  | - | + |
| <b>D3ZFY8</b>     | Ubiquitin-conjugating enzyme E2 variant 1-like             | 795.65 | + | - |
| <b>Q7M767</b>     | Ubiquitin-conjugating enzyme E2 variant 2                  | 795.65 | + | - |
| <b>Q4V8I9</b>     | UDP-glucose pyrophosphorylase 2                            | 168.61 | + | - |
| <b>D3ZRJ5</b>     | Uncharacterized LOC100910852                               | 58     | + | - |
| <b>A0A0G2K5H8</b> | Uncharacterized protein                                    | 135.53 | + | - |
| <b>A0A0G2JW95</b> | Uncharacterized protein                                    | 68.27  | + | - |
| <b>M0R8M5</b>     | Uncharacterized protein                                    | 74.92  | + | - |
| <b>E9PSU5</b>     | Uncharacterized protein                                    | 247.64 | + | - |
| <b>A0A0G2JV25</b> | Uncharacterized protein                                    | 142.58 | + | - |
| <b>M0RCJ6</b>     | Uncharacterized protein                                    | 361.15 | + | - |
| <b>F1LUW0</b>     | Uncharacterized protein                                    | 300.84 | + | - |
| <b>M0RDR2</b>     | Uncharacterized protein                                    | 240.33 | - | + |
| <b>A0A0G2K9B5</b> | Uncharacterized protein                                    | 69.05  | - | + |
| <b>D3ZXR5</b>     | Uncharacterized protein                                    | 151.7  | - | + |
| <b>A0A0G2K0Z2</b> | Uncharacterized protein                                    | 256.95 | - | + |
| <b>A0A0G2K6D3</b> | Uncharacterized protein                                    | 81.74  | - | + |
| <b>F1M3U2</b>     | Uncharacterized protein                                    | 82.77  | - | + |
| <b>F1M6B2</b>     | Uncharacterized protein                                    | 113.66 | - | + |
| <b>F1M269</b>     | Uncharacterized protein                                    | 132.87 | - | + |
| <b>A0A0H2UHJ3</b> | Uncharacterized protein                                    | 100.54 | - | + |

|                   |                                                                              |        |   |   |
|-------------------|------------------------------------------------------------------------------|--------|---|---|
| <b>A0A0G2K3G4</b> | Uncharacterized protein                                                      | 89.37  | - | + |
| <b>D3ZAQ5</b>     | Uncharacterized protein C16orf86 homolog                                     | 188.19 | + | - |
| <b>Q6AXP4</b>     | Uncharacterized protein C2orf81 homolog                                      | 105.8  | - | + |
| <b>Q63357</b>     | Unconventional myosin-I $\delta$                                             | 41     | - | + |
| <b>B2RZ78</b>     | Vacuolar protein sorting-associated protein 29                               | 456.87 | - | + |
| <b>A0A0G2K944</b> | Versican core protein                                                        | 82.41  | - | + |
| <b>Q63666</b>     | Vesicle-associated membrane protein 1                                        | 308.24 | - | + |
| <b>Q5J3M1</b>     | Vomeroneasal type-1 receptor                                                 | 68.49  | - | + |
| <b>D4ADT3</b>     | WAPL cohesin release factor                                                  | 44.39  | + | - |
| <b>D4A106</b>     | WD repeat domain 3                                                           | 142.16 | - | + |
| <b>D3ZQ02</b>     | WD repeat domain 37                                                          | 109.13 | + | - |
| <b>D4A0M9</b>     | WD repeat domain 64                                                          | 55.69  | - | + |
| <b>F1LYQ6</b>     | WD repeat domain 97                                                          | 107.17 | + | - |
| <b>Q4V8G4</b>     | WD repeat-containing and planar cell polarity effector protein fritz homolog | 111.37 | - | + |
| <b>Q5BJU7</b>     | Wiskott-Aldrich syndrome protein family member 1                             | 148.26 | - | + |
| <b>B1WC00</b>     | Zfr protein                                                                  | 313.63 | + | - |
| <b>D3ZYC1</b>     | Zinc finger protein 507                                                      | 143.63 | + | - |
| <b>Q499R0</b>     | Zinc finger protein 518A                                                     | 60.05  | - | + |
| <b>F1LV88</b>     | Zinc finger protein 7                                                        | 791.67 | - | + |
| <b>D3ZAE8</b>     | Zinc finger protein 780B, pseudogene 1                                       | 656.42 | + | - |
| <b>Q3MHS2</b>     | Zinc finger protein 830                                                      | 83     | - | + |
| <b>M0R740</b>     | Zinc finger protein 865-like                                                 | 112.84 | + | - |
| <b>P56163</b>     | Zinc finger protein neuro-d4                                                 | 47.74  | + | - |
| <b>Q562A2</b>     | Zinc finger RNA-binding protein                                              | 316.77 | + | - |
| <b>D4A1E1</b>     | Zinc finger, MYND domain containing 15 (Predicted), isoform CRA_a            | 66.93  | - | + |

<sup>a</sup>Accession ID according to Uniport.org database. Signs of + or – indicates presence or absence of the protein in one of the groups.
