# Supplementary material for: Proteomic approach underlying the hippocampal neurodegeneration caused by low doses of methylmercury after long-term exposure in adult rats
Source: Royal Society of Chemistry journal article supplement (doi:10.1039/c8mt00297e), 2018-11-26
Supplement: c8mt00297e2.pdf [file c8mt00297e2.pdf]

Supplementary Table 2. Identified proteins with expression significantly altered in the hippocampus of rats exposed to MeHg group (EG) vs. control group (CG)

| <sup>a</sup> Access Number | Protein name description                     | PLGS Score | Fold Change |
|----------------------------|----------------------------------------------|------------|-------------|
| P35213                     | 14-3-3 protein beta/alpha                    | 3217.24    | -0.9231     |
| P62260                     | 14-3-3 protein epsilon                       | 3971.27    | -0.9418     |
| P68511                     | 14-3-3 protein eta                           | 2305.94    | -0.9231     |
| P61983                     | 14-3-3 protein gamma                         | 6131.12    | -0.9231     |
| P68255                     | 14-3-3 protein theta                         | 288-0.38   | -0.8694     |
| P63102                     | 14-3-3 protein zeta/delta                    | 8270.35    | -0.8521     |
| P13233                     | 2',3'-cyclic-nucleotide 3'-phosphodiesterase | 1277.06    | -0.5169     |
| Q5XI78                     | 2-oxoglutarate dehydrogenase, mitochondrial  | 44.35      | 2.05443     |
| P38983                     | 40S ribosomal protein SA                     | 295.28     | 2.4596      |
| P63039                     | 60 kDa heat shock protein, mitochondrial     | 3810.85    | 1.10517     |
| P19944                     | 60S acidic ribosomal protein P1              | 2014.83    | -0.9048     |
| Q7TP92                     | Ab1-196                                      | 120.42     | 1.50682     |
| Q9ER34                     | Aconitate hydratase, mitochondrial           | 907.99     | -0.3263     |
| P68035                     | Actin, alpha cardiac muscle 1                | 9131.88    | -0.4677     |
| P68136                     | Actin, alpha skeletal muscle                 | 9169.15    | -0.4677     |
| P62738                     | Actin, aortic smooth muscle                  | 8788.9     | -0.4677     |
| D3ZRN3                     | Actin, beta-like 2                           | 3409.93    | -0.4916     |
| P60711                     | Actin, cytoplasmic 1                         | 18154.38   | -0.4724     |
| P63259                     | Actin, cytoplasmic 2                         | 18154.38   | -0.4724     |
| P63269                     | Actin, gamma-enteric smooth muscle           | 8788.9     | -0.4677     |
| Q4KLF8                     | Actin-related protein 2/3 complex subunit 5  | 371.36     | 3.00417     |
| Q4V7C7                     | Actin-related protein 3                      | 369.89     | -0.5326     |
| F8WG67                     | Acyl-CoA thioesterase 7, isoform CRA_a       | 386.59     | -0.8106     |

|                   |                                                  |         |         |
|-------------------|--------------------------------------------------|---------|---------|
| <b>P11030</b>     | Acyl-CoA-binding protein                         | 1047.04 | -0.7047 |
| <b>A0A0G2JSM7</b> | Adducin 1 (Alpha), isoform CRA_b                 | 305.89  | -0.7945 |
| <b>M0RC66</b>     | Adenylate kinase isoenzyme 1                     | 746.44  | 1.32313 |
| <b>Q08163</b>     | Adenylyl cyclase-associated protein 1            | 588.13  | -0.8607 |
| <b>P84079</b>     | ADP-ribosylation factor 1                        | 1766.91 | -0.5379 |
| <b>P84082</b>     | ADP-ribosylation factor 2                        | 1695.05 | -0.5543 |
| <b>P61206</b>     | ADP-ribosylation factor 3                        | 1766.91 | -0.5326 |
| <b>P61751</b>     | ADP-ribosylation factor 4                        | 1595.47 | -0.5712 |
| <b>P84083</b>     | ADP-ribosylation factor 5                        | 1595.47 | -0.5769 |
| <b>P07943</b>     | Aldose reductase                                 | 103.57  | -0.4868 |
| <b>G3V6Y6</b>     | Alpha-1,4 glucan phosphorylase                   | 124.87  | -0.6703 |
| <b>Q63028</b>     | Alpha-adducin                                    | 305.89  | -0.7945 |
| <b>P85515</b>     | Alpha-centractin                                 | 346.97  | -0.6977 |
| <b>P23565</b>     | Alpha-internexin                                 | 3961.57 | 1.28403 |
| <b>P54921</b>     | Alpha-soluble NSF attachment protein             | 975.67  | -0.8353 |
| <b>P37377</b>     | Alpha-synuclein                                  | 4509.07 | 1.11628 |
| <b>A0A0G2K3U1</b> | AMP deaminase                                    | 140.62  | -0.4538 |
| <b>Q02356</b>     | AMP deaminase 2                                  | 140.62  | -0.4449 |
| <b>F1LPP0</b>     | Amphiphysin                                      | 151.88  | 1.29693 |
| <b>M0R7C6</b>     | Ankyrin repeat domain 33                         | 218.67  | -0.5712 |
| <b>P02650</b>     | Apolipoprotein E                                 | 157.53  | 1.2214  |
| <b>B2RYJ7</b>     | ARP1 actin-related protein 1 homolog B           | 346.97  | -0.657  |
| <b>Q78E60</b>     | Aryl hydrocarbon receptor nuclear translocator 2 | 60.63   | 2.85765 |
| <b>P13221</b>     | Aspartate aminotransferase, cytoplasmic          | 2964.88 | -0.8106 |
| <b>P00507</b>     | Aspartate aminotransferase, mitochondrial        | 3225.35 | -0.5434 |
| <b>Q5U318</b>     | Astrocytic phosphoprotein PEA-15                 | 98.96   | 1.78604 |
| <b>F1LP05</b>     | ATP synthase subunit alpha                       | 6096.17 | 1.2214  |
| <b>P15999</b>     | ATP synthase subunit alpha, mitochondrial        | 6323.49 | 1.2214  |

|               |                                                                     |          |         |
|---------------|---------------------------------------------------------------------|----------|---------|
| <b>G3V6D3</b> | ATP synthase subunit beta                                           | 12373.68 | 1.47698 |
| <b>P10719</b> | ATP synthase subunit beta, mitochondrial                            | 12373.68 | 1.47698 |
| <b>B1WBP7</b> | ATP synthase subunit delta, mitochondrial                           | 873.8    | 1.53726 |
| <b>P35435</b> | ATP synthase subunit gamma, mitochondrial                           | 343.16   | 1.10517 |
| <b>D4A133</b> | ATPase H <sup>+</sup> -transporting V1 subunit A                    | 2455.47  | -0.827  |
| <b>D3ZZS8</b> | ATPase H <sup>+</sup> -transporting V1 subunit B1                   | 482.47   | -0.7483 |
| <b>Q6P503</b> | ATPase H <sup>+</sup> -transporting V1 subunit D                    | 198.22   | 2.07508 |
| <b>Q52KS1</b> | ATP-dependent 6-phosphofructokinase                                 | 213.93   | -0.8521 |
| <b>P47858</b> | ATP-dependent 6-phosphofructokinase, muscle type                    | 121.8    | -0.8353 |
| <b>P47860</b> | ATP-dependent 6-phosphofructokinase, platelet type                  | 180.23   | -0.8187 |
| <b>P85969</b> | Beta-soluble NSF attachment protein                                 | 1241.13  | -0.8781 |
| <b>Q63754</b> | Beta-synuclein                                                      | 12707.9  | 1.17351 |
| <b>Q5HZA7</b> | Bin1 protein                                                        | 1175.82  | 1.1275  |
| <b>Q05175</b> | Brain acid soluble protein 1                                        | 2074.98  | 1.50682 |
| <b>Q3ZB98</b> | Breast carcinoma-amplified sequence 1 homolog                       | 137.19   | 2.2034  |
| <b>G3V9G3</b> | Calcium/calmodulin-dependent protein kinase II, beta, isoform CRA_a | 860.51   | -0.6977 |
| <b>F1LUE2</b> | Calcium/calmodulin-dependent protein kinase II, beta, isoform CRA_c | 875.11   | -0.2209 |
| <b>F1LZG4</b> | Calcium/calmodulin-dependent protein kinase type II subunit alpha   | 1800.28  | -0.2346 |
| <b>P11730</b> | Calcium/calmodulin-dependent protein kinase type II subunit gamma   | 312.81   | -0.7047 |
| <b>P63055</b> | Calmodulin regulator protein PCP4                                   | 1692.38  | 1.17351 |
| <b>D4ABV5</b> | Calmodulin-2                                                        | 8786.66  | 1.20925 |
| <b>Q5U206</b> | Calmodulin-like protein 3                                           | 1989.73  | 1.10517 |
| <b>P18418</b> | Calreticulin                                                        | 702.79   | 1.15027 |
| <b>P12368</b> | cAMP-dependent protein kinase type II-alpha regulatory subunit      | 220.18   | -0.7558 |
| <b>P27139</b> | Carbonic anhydrase 2                                                | 538.72   | -0.8521 |
| <b>F1M642</b> | CCR4-NOT transcription complex, subunit 6-like                      | 241.66   | -0.5273 |
| <b>G3V936</b> | Citrate synthase                                                    | 1830.18  | -0.4317 |
| <b>Q8VHF5</b> | Citrate synthase, mitochondrial                                     | 1602.76  | -0.4449 |

|                   |                                                                                                          |         |         |
|-------------------|----------------------------------------------------------------------------------------------------------|---------|---------|
| <b>F1M779</b>     | Clathrin heavy chain                                                                                     | 199.04  | -0.343  |
| <b>P11442</b>     | Clathrin heavy chain 1                                                                                   | 97.55   | -0.3465 |
| <b>P08081</b>     | Clathrin light chain A                                                                                   | 243.32  | 2.29332 |
| <b>P08082</b>     | Clathrin light chain B                                                                                   | 190.91  | 1.97388 |
| <b>B0BNA5</b>     | Coactosin-like protein                                                                                   | 264.02  | 1.46228 |
| <b>P45592</b>     | Cofilin-1                                                                                                | 9901.81 | -0.9512 |
| <b>A0A096P6L9</b> | Complement C5                                                                                            | 205.62  | -0.4868 |
| <b>D3ZPI8</b>     | Complement C8 gamma chain                                                                                | 142.08  | -0.1809 |
| <b>P63041</b>     | Complexin-1                                                                                              | 296.06  | 1.20925 |
| <b>P84087</b>     | Complexin-2                                                                                              | 732.07  | 1.11628 |
| <b>P07335</b>     | Creatine kinase B-type                                                                                   | 9604.02 | 1.17351 |
| <b>P25809</b>     | Creatine kinase U-type, mitochondrial                                                                    | 657.88  | -0.7634 |
| <b>Q68FY0</b>     | Cytochrome b-c1 complex subunit 1, mitochondrial                                                         | 931.37  | -0.5712 |
| <b>Q5M9I5</b>     | Cytochrome b-c1 complex subunit 6, mitochondrial                                                         | 327.05  | -0.8958 |
| <b>B2RYS2</b>     | Cytochrome b-c1 complex subunit 7                                                                        | 182.95  | 1.28403 |
| <b>P11240</b>     | Cytochrome c oxidase subunit 5A, mitochondrial                                                           | 3687.85 | 1.1853  |
| <b>P12075</b>     | Cytochrome c oxidase subunit 5B, mitochondrial                                                           | 1453.15 | 1.2586  |
| <b>P62898</b>     | Cytochrome c, somatic                                                                                    | 940.1   | 1.16183 |
| <b>Q64559</b>     | Cytosolic acyl coenzyme A thioester hydrolase                                                            | 386.59  | -0.8025 |
| <b>P80254</b>     | D-dopachrome decarboxylase                                                                               | 2487.91 | -0.9324 |
| <b>Q6MG13</b>     | DEAD/H (Asp-Glu-Ala-Asp/His) box polypeptide 16                                                          | 143.83  | -0.4066 |
| <b>A0A0G2KAY1</b> | DEAH-box helicase 16                                                                                     | 13-0.39 | -0.522  |
| <b>Q62651</b>     | Delta(3,5)-Delta(2,4)-dienoyl-CoA isomerase, mitochondrial                                               | 61.84   | 3.06485 |
| <b>Q6P725</b>     | Desmin                                                                                                   | 151.67  | 1.29693 |
| <b>G3V6P2</b>     | Dihydrolipoamide S-succinyltransferase (E2 component of 2-oxo-glutarate complex), isoform CRA_a          | 362.14  | 1.34986 |
| <b>Q6P6R2</b>     | Dihydrolipoyl dehydrogenase, mitochondrial                                                               | 1245.81 | -0.7118 |
| <b>P08461</b>     | Dihydrolipoyllysine-residue acetyltransferase component of pyruvate dehydrogenase complex, mitochondrial | 588.04  | -0.8958 |

|                   |                                                                                                                  |          |         |
|-------------------|------------------------------------------------------------------------------------------------------------------|----------|---------|
| <b>Q01205</b>     | Dihydrolipoyllysine-residue succinyltransferase component of 2-oxoglutarate dehydrogenase complex, mitochondrial | 362.14   | 1.34986 |
| <b>P11348</b>     | Dihydropteridine reductase                                                                                       | 1220.52  | 1.1275  |
| <b>Q62950</b>     | Dihydropyrimidinase-related protein 1                                                                            | 2225.35  | -0.8958 |
| <b>P47942</b>     | Dihydropyrimidinase-related protein 2                                                                            | 14884.86 | -0.9048 |
| <b>Q62952</b>     | Dihydropyrimidinase-related protein 3                                                                            | 773.62   | -0.8958 |
| <b>Q9JHU0</b>     | Dihydropyrimidinase-related protein 5                                                                            | 88.68    | -0.8781 |
| <b>A0A0G2K8Y5</b> | Dihydropyrimidinase-related protein 5-like                                                                       | 83.79    | -0.8781 |
| <b>P21575</b>     | Dynamin-1                                                                                                        | 1336.73  | -0.7047 |
| <b>O35303</b>     | Dynamin-1-like protein                                                                                           | 135.47   | -0.3535 |
| <b>P39052</b>     | Dynamin-2                                                                                                        | 188.06   | -0.7483 |
| <b>Q08877</b>     | Dynamin-3                                                                                                        | 16-0.01  | -0.7483 |
| <b>M0R757</b>     | Elongation factor 1-alpha                                                                                        | 1276.23  | -0.8781 |
| <b>F1M6C2</b>     | Elongation factor 1-alpha 1 pseudogene                                                                           | 1254.04  | -0.8694 |
| <b>P62632</b>     | Elongation factor 1-alpha 2                                                                                      | 1599.24  | -0.7334 |
| <b>P85834</b>     | Elongation factor Tu, mitochondrial                                                                              | 151.72   | -0.8607 |
| <b>O35179</b>     | Endophilin-A1                                                                                                    | 951.5    | 1.08329 |
| <b>O88752</b>     | Epsilon 1 globin                                                                                                 | 2342.47  | 1.11628 |
| <b>O88339</b>     | Epsin-1                                                                                                          | 144.47   | 2.29332 |
| <b>D3ZAY2</b>     | Erythrocyte membrane protein band 4.1-like 2                                                                     | 56.99    | -0.8958 |
| <b>Q5RKI1</b>     | Eukaryotic initiation factor 4A-II                                                                               | 193.81   | 1.16183 |
| <b>Q3B8Q2</b>     | Eukaryotic initiation factor 4A-III                                                                              | 115.69   | 1.55271 |
| <b>Q6P3V8</b>     | Eukaryotic translation initiation factor 4A1                                                                     | 171.59   | 1.24608 |
| <b>Q5XI72</b>     | Eukaryotic translation initiation factor 4H                                                                      | 123.98   | 1.37713 |
| <b>B2GUZ5</b>     | F-actin-capping protein subunit alpha-1                                                                          | 62.35    | 1.76827 |
| <b>A0A0G2KAM4</b> | Fascin                                                                                                           | 273.28   | -0.8437 |
| <b>P55053</b>     | Fatty acid-binding protein, epidermal                                                                            | 177.23   | 1.52196 |
| <b>A0A0G2K3Q6</b> | Fructose-bisphosphate aldolase                                                                                   | 5515.53  | -0.7634 |

|                   |                                                           |          |         |
|-------------------|-----------------------------------------------------------|----------|---------|
| <b>P05065</b>     | Fructose-bisphosphate aldolase A                          | 4119.16  | -0.5117 |
| <b>P09117</b>     | Fructose-bisphosphate aldolase C                          | 5515.53  | -0.7634 |
| <b>Q5PQK2</b>     | FUS RNA-binding protein                                   | 116.9    | 4.1787  |
| <b>D3ZSS5</b>     | G protein subunit alpha transducin 1                      | 177.61   | -0.644  |
| <b>D4AA42</b>     | G protein subunit alpha transducin 2                      | 177.61   | -0.6313 |
| <b>P07323</b>     | Gamma-enolase                                             | 4571.83  | -0.9608 |
| <b>P47819</b>     | Glial fibrillary acidic protein                           | 4905.74  | 1.24608 |
| <b>Q62669</b>     | Globin a1                                                 | 1088.11  | -0.657  |
| <b>A0A0G2JSW3</b> | Globin a4                                                 | 7369.64  | -0.9231 |
| <b>A0A0G2JSV6</b> | Globin c2                                                 | 12758.02 | 1.09417 |
| <b>Q6P6V0</b>     | Glucose-6-phosphate isomerase                             | 229.26   | -0.4724 |
| <b>P10860</b>     | Glutamate dehydrogenase 1, mitochondrial                  | 1778.92  | -0.7711 |
| <b>P09606</b>     | Glutamine synthetase                                      | 2090.81  | -0.419  |
| <b>G3V983</b>     | Glutathione S-transferase                                 | 548.37   | -0.8607 |
| <b>P04905</b>     | Glutathione S-transferase Mu 1                            | 642.5    | -0.827  |
| <b>P08010</b>     | Glutathione S-transferase Mu 2                            | 194.1    | -0.7408 |
| <b>P04906</b>     | Glutathione S-transferase P                               | 859.28   | -0.8869 |
| <b>P08009</b>     | Glutathione S-transferase Yb-3                            | 452.32   | -0.7408 |
| <b>D3ZVQ8</b>     | Glutathione S-transferase, mu 6-like                      | 176.48   | -0.5117 |
| <b>B1WBQ8</b>     | Glyceraldehyde-3-phosphate dehydrogenase                  | 1174.44  | 1.29693 |
| <b>Q9ESV6</b>     | Glyceraldehyde-3-phosphate dehydrogenase, testis-specific | 1174.44  | 1.29693 |
| <b>P53534</b>     | Glycogen phosphorylase, brain form                        | 151.8    | -0.6771 |
| <b>P09811</b>     | Glycogen phosphorylase, liver form                        | 99.04    | -0.5712 |
| <b>PYGM_RABIT</b> | Glycogen phosphorylase, muscle form                       | 148.5    | -0.6005 |
| <b>Q5EEY3</b>     | GTP-binding protein G-alpha-i2 splice variant b           | 170.17   | -0.6313 |
| <b>Q9WTT6</b>     | Guanine deaminase                                         | 435.69   | -0.657  |
| <b>P10824</b>     | Guanine nucleotide-binding protein G(i) subunit alpha-1   | 184.73   | -0.6376 |
| <b>P04897</b>     | Guanine nucleotide-binding protein G(i) subunit alpha-2   | 184.73   | -0.6505 |

|                   |                                                                      |          |         |
|-------------------|----------------------------------------------------------------------|----------|---------|
| <b>P54311</b>     | Guanine nucleotide-binding protein G(l)/G(s)/G(t) subunit beta-1     | 2833.24  | -0.5016 |
| <b>P54313</b>     | Guanine nucleotide-binding protein G(l)/G(s)/G(t) subunit beta-2     | 2061.65  | -0.5599 |
| <b>P52287</b>     | Guanine nucleotide-binding protein G(l)/G(s)/G(t) subunit beta-3     | 728.13   | -0.3716 |
| <b>P08753</b>     | Guanine nucleotide-binding protein G(k) subunit alpha                | 184.73   | -0.6376 |
| <b>P59215</b>     | Guanine nucleotide-binding protein G(o) subunit alpha                | 618.59   | -0.5886 |
| <b>G3V8E8</b>     | Guanine nucleotide-binding protein G(olf) subunit alpha              | 170.17   | -0.644  |
| <b>P63095</b>     | Guanine nucleotide-binding protein G(s) subunit alpha isoforms short | 174.06   | -0.6376 |
| <b>Q63803</b>     | Guanine nucleotide-binding protein G(s) subunit alpha isoforms XLas  | 174.06   | -0.6313 |
| <b>P29348</b>     | Guanine nucleotide-binding protein G(t) subunit alpha-3              | 203.11   | -0.6376 |
| <b>Q63210</b>     | Guanine nucleotide-binding protein subunit alpha-12                  | 189.18   | -0.657  |
| <b>Q6Q7Y5</b>     | Guanine nucleotide-binding protein subunit alpha-13                  | 189.18   | -0.6376 |
| <b>O35353</b>     | Guanine nucleotide-binding protein subunit beta-4                    | 1850.94  | -0.4868 |
| <b>M0RBJ0</b>     | Guanine nucleotide-binding protein subunit gamma                     | 4414.54  | -0.4538 |
| <b>P0DMW0</b>     | Heat shock 70 kDa protein 1A                                         | 1181.2   | -0.9231 |
| <b>P0DMW1</b>     | Heat shock 70 kDa protein 1B                                         | 1139.67  | -0.9048 |
| <b>P55063</b>     | Heat shock 70 kDa protein 1-like                                     | 1102.2   | -0.8781 |
| <b>Q5XHZ0</b>     | Heat shock protein 75 kDa, mitochondrial                             | 368.35   | -0.7634 |
| <b>P82995</b>     | Heat shock protein HSP 90-alpha                                      | 1118.22  | -0.9048 |
| <b>P01946</b>     | Hemoglobin subunit alpha-1/2                                         | 12758.02 | 1.10517 |
| <b>P02091</b>     | Hemoglobin subunit beta-1                                            | 7369.64  | -0.9324 |
| <b>P11517</b>     | Hemoglobin subunit beta-2                                            | 3781.96  | 1.1275  |
| <b>A0A0G2JTW9</b> | Hemoglobin, beta adult major chain                                   | 1088.11  | -0.6505 |
| <b>Q9JJ54</b>     | Heterogeneous nuclear ribonucleoprotein D0                           | 117.32   | 1.87761 |
| <b>M0R9K1</b>     | Heterogeneous nuclear ribonucleoprotein K-like                       | 205.04   | 1.43333 |
| <b>F1LQ48</b>     | Heterogeneous nuclear ribonucleoprotein L                            | 63.02    | 1.64872 |
| <b>M0R6X5</b>     | Histone H2A                                                          | 67.7     | 1.55271 |
| <b>P0C169</b>     | Histone H2A type 1-C                                                 | 1246.7   | 1.34986 |
| <b>P0C170</b>     | Histone H2A type 1-E                                                 | 1246.7   | 1.34986 |

|                   |                                                               |         |         |
|-------------------|---------------------------------------------------------------|---------|---------|
| <b>Q64598</b>     | Histone H2A type 1-F                                          | 1246.7  | 1.34986 |
| <b>P0CC09</b>     | Histone H2A type 2-A                                          | 1246.7  | 1.33643 |
| <b>Q4FZT6</b>     | Histone H2A type 3                                            | 1246.7  | 1.34986 |
| <b>Q00728</b>     | Histone H2A type 4                                            | 1246.7  | 1.34986 |
| <b>M0RBQ5</b>     | Histone H2B                                                   | 5432.61 | 1.63232 |
| <b>Q00715</b>     | Histone H2B type 1                                            | 5802.96 | 1.58407 |
| <b>Q00729</b>     | Histone H2B type 1-A                                          | 1223.1  | 1.59999 |
| <b>D3ZK97</b>     | Histone H3                                                    | 741.51  | 1.11628 |
| <b>P84245</b>     | Histone H3.3                                                  | 741.51  | 1.11628 |
| <b>P62804</b>     | Histone H4                                                    | 7610.9  | 1.10517 |
| <b>P97697</b>     | Inositol monophosphatase 1                                    | 375.07  | -0.7945 |
| <b>Q9JKU3</b>     | Intraflagellar transport protein 172 homolog                  | 75.93   | 2.05443 |
| <b>Q99NA5</b>     | Isocitrate dehydrogenase [NAD] subunit alpha, mitochondrial   | 558.52  | -0.8187 |
| <b>P41565</b>     | Isocitrate dehydrogenase [NAD] subunit gamma 1, mitochondrial | 741.17  | -0.827  |
| <b>F1LNF7</b>     | Isocitrate dehydrogenase [NAD] subunit, mitochondrial         | 558.52  | -0.827  |
| <b>Q6IFZ5</b>     | Keratin 76                                                    | 73.38   | 3.09566 |
| <b>A0A0G2JW69</b> | Keratin 78                                                    | 55.76   | 3.70617 |
| <b>Q6IG11</b>     | Keratin 81                                                    | 55.76   | 3.74342 |
| <b>A7M746</b>     | Keratin 83                                                    | 55.76   | 3.81904 |
| <b>D3ZSY5</b>     | Keratin 84                                                    | 71.11   | 3.74342 |
| <b>A7M777</b>     | Keratin 85                                                    | 55.76   | 3.63279 |
| <b>A0A0G2QC11</b> | Keratin 86                                                    | 55.76   | 3.81904 |
| <b>Q6IG00</b>     | Keratin, type II cytoskeletal 4                               | 55.76   | 3.49034 |
| <b>F7FFV2</b>     | Keratin, type II cytoskeletal 5                               | 64.72   | 3.89619 |
| <b>Q6IG12</b>     | Keratin, type II cytoskeletal 7                               | 55.76   | 4.80665 |
| <b>Q6IG03</b>     | Keratin, type II cytoskeletal 73                              | 179.59  | 2.82922 |
| <b>Q6IG05</b>     | Keratin, type II cytoskeletal 75                              | 55.76   | 3.85743 |
| <b>Q10758</b>     | Keratin, type II cytoskeletal 8                               | 55.76   | 4.85496 |



|                   |                                                                             |          |         |
|-------------------|-----------------------------------------------------------------------------|----------|---------|
| <b>Q6P7Q4</b>     | Lactoylglutathione lyase                                                    | 185.87   | 1.43333 |
| <b>Q6AYX2</b>     | L-lactate dehydrogenase                                                     | 197.74   | -0.8025 |
| <b>P04642</b>     | L-lactate dehydrogenase A chain                                             | 2429.92  | -0.6313 |
| <b>P42123</b>     | L-lactate dehydrogenase B chain                                             | 2515.2   | -0.657  |
| <b>Q6TXF8</b>     | LRRGT00041                                                                  | 193.22   | -0.5712 |
| <b>P30904</b>     | Macrophage migration inhibitory factor                                      | 3659.21  | 1.10517 |
| <b>O88989</b>     | Malate dehydrogenase, cytoplasmic                                           | 4452.33  | -0.9231 |
| <b>P04636</b>     | Malate dehydrogenase, mitochondrial                                         | 14925.98 | -0.8869 |
| <b>Q3KR86</b>     | MICOS complex subunit Mic60                                                 | 352.44   | -0.8437 |
| <b>D4A1Q2</b>     | Microtubule-associated protein                                              | 1430.72  | 1.10517 |
| <b>A0A0U1RS27</b> | Microtubule-associated protein 2                                            | 123.59   | 1.55271 |
| <b>F1LQZ9</b>     | Microtubule-associated protein 6                                            | 310.6    | 1.20925 |
| <b>Q5XIT1</b>     | Microtubule-associated protein RP/EB family member 3                        | 235.05   | 2.2705  |
| <b>O08839</b>     | Myc box-dependent-interacting protein 1                                     | 1181.27  | 1.1275  |
| <b>Q5XFW1</b>     | Myelin basic protein                                                        | 5695.46  | 1.36343 |
| <b>P60203</b>     | Myelin proteolipid protein                                                  | 1745.36  | -0.0907 |
| <b>P62775</b>     | Myotrophin                                                                  | 112.18   | 1.37713 |
| <b>Q5RJQ4</b>     | NAD-dependent protein deacetylase sirtuin-2                                 | 518.37   | -0.6977 |
| <b>D3ZG43</b>     | NADH dehydrogenase (Ubiquinone) Fe-S protein 3 (Predicted), isoform CRA_c   | 345.14   | -0.7711 |
| <b>Q63362</b>     | NADH dehydrogenase [ubiquinone] 1 alpha subcomplex subunit 5                | 233.59   | -0.5769 |
| <b>Q5BK63</b>     | NADH dehydrogenase [ubiquinone] 1 alpha subcomplex subunit 9, mitochondrial | 338.44   | -0.1313 |
| <b>Q5XIH3</b>     | NADH dehydrogenase [ubiquinone] flavoprotein 1, mitochondrial               | 227.12   | -0.8025 |
| <b>P19234</b>     | NADH dehydrogenase [ubiquinone] flavoprotein 2, mitochondrial               | 311.33   | 1.40495 |
| <b>D4A0T0</b>     | NADH:ubiquinone oxidoreductase subunit B10                                  | 325.3    | 1.13883 |
| <b>A0A0G2JWS2</b> | Nebulette                                                                   | 74.68    | 10.6974 |
| <b>F1LQ81</b>     | N-ethylmaleimide sensitive fusion protein, isoform CRA_b                    | 191.61   | -0.5434 |
| <b>F1LNY3</b>     | Neural cell adhesion molecule 1                                             | 340.67   | -0.4107 |

|                   |                                                  |          |         |
|-------------------|--------------------------------------------------|----------|---------|
| <b>M0R9J4</b>     | Neuroendocrine secretory protein 55              | 170.17   | -0.6313 |
| <b>P16884</b>     | Neurofilament heavy polypeptide                  | 604.89   | 1.15027 |
| <b>P19527</b>     | Neurofilament light polypeptide                  | 4999.24  | 1.59999 |
| <b>G3V7S2</b>     | Neurofilament medium polypeptide                 | 1088.83  | 1.43333 |
| <b>D3ZTX2</b>     | NK2 homeobox 4                                   | 134.59   | -0.357  |
| <b>A0A0G2JSV0</b> | N-myc downstream regulated gene 2, isoform CRA_a | 418.67   | -0.6703 |
| <b>A0A0G2JSU4</b> | N-myc downstream regulated gene 2, isoform CRA_b | 418.67   | -0.6907 |
| <b>D3ZSF3</b>     | Peptidyl-prolyl cis-trans isomerase              | 305.54   | -0.8958 |
| <b>P10111</b>     | Peptidyl-prolyl cis-trans isomerase A            | 9173.66  | -0.8187 |
| <b>G3V7I0</b>     | Peroxiredoxin 3                                  | 473.15   | -0.6839 |
| <b>P35704</b>     | Peroxiredoxin-2                                  | 2886.1   | -0.8958 |
| <b>Q9Z0V5</b>     | Peroxiredoxin-4                                  | 199.72   | -0.0464 |
| <b>O35244</b>     | Peroxiredoxin-6                                  | 5921.94  | 1.1275  |
| <b>P31044</b>     | Phosphatidylethanolamine-binding protein 1       | 11950.35 | 1.2214  |
| <b>P16617</b>     | Phosphoglycerate kinase 1                        | 4170.6   | -0.9324 |
| <b>P16290</b>     | Phosphoglycerate mutase 2                        | 174.36   | -0.827  |
| <b>P0CG51</b>     | Polyubiquitin-B                                  | 2453.46  | 1.09417 |
| <b>F1LML2</b>     | Polyubiquitin-C                                  | 2453.46  | 1.09417 |
| <b>P54708</b>     | Potassium-transporting ATPase alpha chain 2      | 265.1    | -0.463  |
| <b>A0A0G2JUG1</b> | Predicted gene 5414                              | 55.76    | 3.85743 |
| <b>P67779</b>     | Prohibitin                                       | 448.9    | 1.2586  |
| <b>D3ZFH6</b>     | Prohibitin, pseudogene 1                         | 225.35   | 1.19722 |
| <b>Q5XIH7</b>     | Prohibitin-2                                     | 375.54   | 1.20925 |
| <b>Q9QXU9</b>     | ProSAAS                                          | 260.91   | 1.17351 |
| <b>P11598</b>     | Protein disulfide-isomerase A3                   | 172.71   | 1.19722 |
| <b>Q5GFD9</b>     | Protein IMPACT                                   | 295.73   | -0.7261 |
| <b>D3ZC07</b>     | Protein kinase N3                                | 133.81   | 1.66529 |
| <b>Q8VBU2</b>     | Protein NDRG2                                    | 418.67   | -0.6907 |

|                   |                                                                                  |         |         |
|-------------------|----------------------------------------------------------------------------------|---------|---------|
| <b>P04631</b>     | Protein S100-B                                                                   | 5909.12 | 1.06184 |
| <b>Q63945</b>     | Protein SET                                                                      | 118.74  | 1.61607 |
| <b>A0A140TAB9</b> | Protein-L-isoaspartate O-methyltransferase                                       | 1931.79 | 1.16183 |
| <b>P22062</b>     | Protein-L-isoaspartate(D-aspartate) O-methyltransferase                          | 1944.29 | 1.15027 |
| <b>O35331</b>     | Pyridoxal kinase                                                                 | 168.67  | 1.91554 |
| <b>F7FKI5</b>     | Pyruvate dehydrogenase E1 component subunit alpha                                | 382.41  | -0.8106 |
| <b>P26284</b>     | Pyruvate dehydrogenase E1 component subunit alpha, somatic form, mitochondrial   | 382.41  | -0.7945 |
| <b>A0A0G2KAM3</b> | Pyruvate dehydrogenase E1 component subunit beta, mitochondrial                  | 3227.07 | -0.8869 |
| <b>M0RD14</b>     | Pyruvate kinase                                                                  | 4589.29 | -0.5543 |
| <b>P11980</b>     | Pyruvate kinase PKM                                                              | 6418.95 | -0.5434 |
| <b>P50398</b>     | Rab GDP dissociation inhibitor alpha                                             | 2968.98 | -0.4317 |
| <b>P50399</b>     | Rab GDP dissociation inhibitor beta                                              | 1342.17 | -0.5066 |
| <b>D4A823</b>     | RAD52 motif 1 (Predicted), isoform CRA_c                                         | 141.33  | -0.357  |
| <b>F1LV89</b>     | Rap1 GTPase-activating protein                                                   | 117.55  | -0.3791 |
| <b>D3ZTA4</b>     | RCG26849, isoform CRA_a                                                          | 269.88  | 1.82212 |
| <b>B5DFG5</b>     | RCG53214, isoform CRA_d                                                          | 403.85  | -0.8869 |
| <b>Q0ZFS8</b>     | RCG61099, isoform CRA_c                                                          | 227.42  | 1.50682 |
| <b>Q5XI73</b>     | Rho GDP-dissociation inhibitor 1                                                 | 1706.63 | -0.9324 |
| <b>P10362</b>     | Secretogranin-2                                                                  | 75.52   | 1.23368 |
| <b>A0A0U1RRT8</b> | Septin 6                                                                         | 403.85  | -0.8694 |
| <b>B3GNI6</b>     | Septin-11                                                                        | 489.22  | -0.9139 |
| <b>Q91Y81</b>     | Septin-2                                                                         | 197.54  | 1.30996 |
| <b>Q9WVC0</b>     | Septin-7                                                                         | 861.81  | -0.8694 |
| <b>A0A0G2K7T5</b> | Serine/threonine-protein phosphatase                                             | 412.68  | -0.5769 |
| <b>Z4YNW7</b>     | Serine/threonine-protein phosphatase 2A 55 kDa regulatory subunit B              | 151.75  | -0.3716 |
| <b>P36877</b>     | Serine/threonine-protein phosphatase 2A 55 kDa regulatory subunit B beta isoform | 151.75  | -0.3716 |

|                   |                                                                                 |         |         |
|-------------------|---------------------------------------------------------------------------------|---------|---------|
| <b>P20651</b>     | Serine/threonine-protein phosphatase 2B catalytic subunit beta isoform          | 417.06  | -0.5655 |
| <b>P62138</b>     | Serine/threonine-protein phosphatase PP1-alpha catalytic subunit                | 153.04  | -0.4274 |
| <b>P62142</b>     | Serine/threonine-protein phosphatase PP1-beta catalytic subunit                 | 153.04  | -0.4493 |
| <b>P63088</b>     | Serine/threonine-protein phosphatase PP1-gamma catalytic subunit                | 153.04  | -0.4232 |
| <b>P02770</b>     | Serum albumin                                                                   | 42.5    | -0.8694 |
| <b>Q5EBB0</b>     | Similar to 14-3-3 protein sigma                                                 | 2066.69 | -0.9324 |
| <b>D3ZQL7</b>     | Similar to 25 kDa brain-specific protein (P25-alpha) (Predicted), isoform CRA_a | 2393.8  | 1.09417 |
| <b>F1M9V3</b>     | Similar to Alpha enolase (2-phospho-D-glycerate hydro-lyase)                    | 342.69  | 1.24608 |
| <b>D4A5L9</b>     | Similar to Cytochrome c, somatic                                                | 940.1   | 1.16183 |
| <b>F1LUV3</b>     | Similar to glyceraldehyde-3-phosphate dehydrogenase                             | 108.41  | 1.69893 |
| <b>G3V8S4</b>     | Sodium/potassium-transporting ATPase subunit alpha                              | 265.1   | -0.4677 |
| <b>P06685</b>     | Sodium/potassium-transporting ATPase subunit alpha-1                            | 100.76  | -0.3791 |
| <b>P06686</b>     | Sodium/potassium-transporting ATPase subunit alpha-2                            | 117     | -0.4148 |
| <b>P06687</b>     | Sodium/potassium-transporting ATPase subunit alpha-3                            | 194.99  | -0.3906 |
| <b>Q64541</b>     | Sodium/potassium-transporting ATPase subunit alpha-4                            | 282.29  | -0.4677 |
| <b>P07340</b>     | Sodium/potassium-transporting ATPase subunit beta-1                             | 190.39  | -0.3642 |
| <b>A0A0G2K2J7</b> | Solute carrier family 25 member 12                                              | 575.25  | -0.6126 |
| <b>A0A0G2JZ69</b> | Spectrin alpha chain, non-erythrocytic 1                                        | 262.66  | -0.9139 |
| <b>P13668</b>     | Stathmin                                                                        | 1007.82 | 1.53726 |
| <b>P21818</b>     | Stathmin-2                                                                      | 150.78  | 2.2034  |
| <b>P13086</b>     | Succinate--CoA ligase [ADP/GDP-forming] subunit alpha, mitochondrial            | 358.74  | -0.7334 |
| <b>F1LM47</b>     | Succinate--CoA ligase [ADP-forming] subunit beta, mitochondrial                 | 199.01  | -0.9139 |
| <b>D3ZEV8</b>     | Sushi domain containing 2 (Predicted), isoform CRA_a                            | 110.36  | -0.4724 |
| <b>G3V733</b>     | Synapsin II, isoform CRA_a                                                      | 4056.34 | -0.7483 |
| <b>P09951</b>     | Synapsin-1                                                                      | 3410.3  | 1.04081 |
| <b>Q63537</b>     | Synapsin-2                                                                      | 4056.34 | -0.7483 |
| <b>F8WG75</b>     | Synaptosomal-associated protein                                                 | 1087.23 | 1.2214  |

|                   |                                                         |          |         |
|-------------------|---------------------------------------------------------|----------|---------|
| <b>P60881</b>     | Synaptosomal-associated protein 25                      | 1536.58  | 1.11628 |
| <b>P61765</b>     | Syntaxin-binding protein 1                              | 2185.32  | -0.3166 |
| <b>Q68FQ0</b>     | T-complex protein 1 subunit epsilon                     | 233.25   | -0.7558 |
| <b>Q05546</b>     | Tenascin-R                                              | 59.06    | 1.16183 |
| <b>Q9Z0V6</b>     | Thioredoxin-dependent peroxide reductase, mitochondrial | 473.15   | -0.6771 |
| <b>F1LPS8</b>     | Transcriptional activator protein Pur-alpha             | 1157.66  | 1.20925 |
| <b>A0A0G2K6I5</b> | Transgelin                                              | 330.06   | 1.2214  |
| <b>Q5XFX0</b>     | Transgelin-2                                            | 126.47   | -0.7408 |
| <b>P50137</b>     | Transketolase                                           | 219.59   | -0.8694 |
| <b>P63029</b>     | Translationally-controlled tumor protein                | 278.37   | 1.89648 |
| <b>A0A0G2JWU1</b> | Triosephosphate isomerase                               | 7055.07  | -0.8521 |
| <b>P70566</b>     | Tropomodulin-2                                          | 218.39   | 1.40495 |
| <b>Q63610</b>     | Tropomyosin alpha-3 chain                               | 103.38   | 1.73325 |
| <b>F1LUM5</b>     | Tubulin alpha chain                                     | 1907.25  | -0.5488 |
| <b>P68370</b>     | Tubulin alpha-1A chain                                  | 17536.7  | -0.4404 |
| <b>Q6P9V9</b>     | Tubulin alpha-1B chain                                  | 15785.07 | -0.4274 |
| <b>Q6AYZ1</b>     | Tubulin alpha-1C chain                                  | 14809.92 | -0.4584 |
| <b>Q68FR8</b>     | Tubulin alpha-3 chain                                   | 13904.29 | -0.436  |
| <b>Q5XIF6</b>     | Tubulin alpha-4A chain                                  | 12891.46 | -0.436  |
| <b>Q6AY56</b>     | Tubulin alpha-8 chain                                   | 7545.25  | -0.3679 |
| <b>Q4QQV0</b>     | Tubulin beta chain                                      | 13767.53 | -0.4771 |
| <b>P85108</b>     | Tubulin beta-2A chain                                   | 21576.78 | -0.4916 |
| <b>Q3KRE8</b>     | Tubulin beta-2B chain                                   | 21249.4  | -0.4868 |
| <b>Q4QRB4</b>     | Tubulin beta-3 chain                                    | 19581.19 | -0.4916 |
| <b>Q6P9T8</b>     | Tubulin beta-4B chain                                   | 23390.48 | -0.4677 |
| <b>P69897</b>     | Tubulin beta-5 chain                                    | 20969.97 | -0.4819 |
| <b>A0A0G2K2D6</b> | Tubulin polymerization-promoting protein                | 2393.8   | 1.07251 |
| <b>Q6IG08</b>     | Type II keratin 23                                      | 55.76    | 3.81904 |

|                   |                                                     |         |         |
|-------------------|-----------------------------------------------------|---------|---------|
| <b>A0A0G2JVA8</b> | Type II keratin Kb15                                | 55.76   | 3.93535 |
| <b>D4AA63</b>     | Ubiquilin 2                                         | 62.64   | 2.03399 |
| <b>F1LU69</b>     | Ubiquitin B pseudogene 4                            | 2047.21 | 1.10517 |
| <b>Q00981</b>     | Ubiquitin carboxyl-terminal hydrolase isozyme L1    | 2801.35 | -0.8521 |
| <b>B2RYG6</b>     | Ubiquitin thioesterase OTUB1                        | 313.49  | 1.69893 |
| <b>P62982</b>     | Ubiquitin-40S ribosomal protein S27a                | 2453.46 | 1.08329 |
| <b>P62986</b>     | Ubiquitin-60S ribosomal protein L40                 | 2453.46 | 1.10517 |
| <b>Q9EQX9</b>     | Ubiquitin-conjugating enzyme E2 N                   | 427.42  | 1.30996 |
| <b>A0A0G2K3Z9</b> | Uncharacterized protein                             | 73.37   | 1.13883 |
| <b>F1M1Y1</b>     | Uncharacterized protein                             | 308.74  | 1.10517 |
| <b>F1M2S4</b>     | Uncharacterized protein                             | 148.25  | 1.64872 |
| <b>A0A0G2K099</b> | Uncharacterized protein                             | 3186.49 | 1.2586  |
| <b>F1M2N4</b>     | Uncharacterized protein                             | 2955.45 | 1.23368 |
| <b>A0A0G2K7R1</b> | Uncharacterized protein                             | 4677.37 | 1.55271 |
| <b>F1M4G6</b>     | Uncharacterized protein                             | 2673.43 | 1.23368 |
| <b>D3ZEN2</b>     | Uncharacterized protein                             | 2673.43 | 1.23368 |
| <b>F1LUI2</b>     | Uncharacterized protein                             | 435.72  | 1.13883 |
| <b>A0A0G2JYY8</b> | Uncharacterized protein                             | 2083.45 | -0.9231 |
| <b>D3ZME3</b>     | Uncharacterized protein                             | 2083.45 | -0.9324 |
| <b>Q9QUL6</b>     | Vesicle-fusing ATPase                               | 191.61  | -0.5543 |
| <b>P31000</b>     | Vimentin                                            | 308.71  | 1.08329 |
| <b>P81155</b>     | Voltage-dependent anion-selective channel protein 2 | 1235.06 | -0.6505 |
| <b>Q9R1Z0</b>     | Voltage-dependent anion-selective channel protein 3 | 501.47  | -0.6839 |
| <b>Q5M7T6</b>     | V-type proton ATPase subunit                        | 291.59  | -0.6505 |
| <b>P62815</b>     | V-type proton ATPase subunit B, brain isoform       | 826.52  | -0.7945 |
| <b>P50408</b>     | V-type proton ATPase subunit F                      | 396.23  | 1.78604 |
| <b>A0A0G2K2R1</b> | V-type proton ATPase subunit G                      | 190.55  | 1.59999 |
| <b>Q5RKI0</b>     | WD repeat-containing protein 1                      | 460.14  | -0.7866 |

**G3V9G6**

Zinc finger protein 111

44.33

14.154

<sup>a</sup>Accession ID according to Uniport.org database.

Signs of + or – indicates up or down-regulation, respectively, when EG is compared to CG.
